# Supplementary material for: The FMRFamide-like peptide FLP-11 regulates the production and secretion of the 1 TGF-β-like protein DAF-7 during Caenorhabditis elegans larval development
Source: Research Square preprint supplement (doi:10.21203/rs.3.rs-7478256/v1), 2025-10-15

**Supplementary Figure 1. Relative dauer diapause of the worms losing each *flp* gene.**


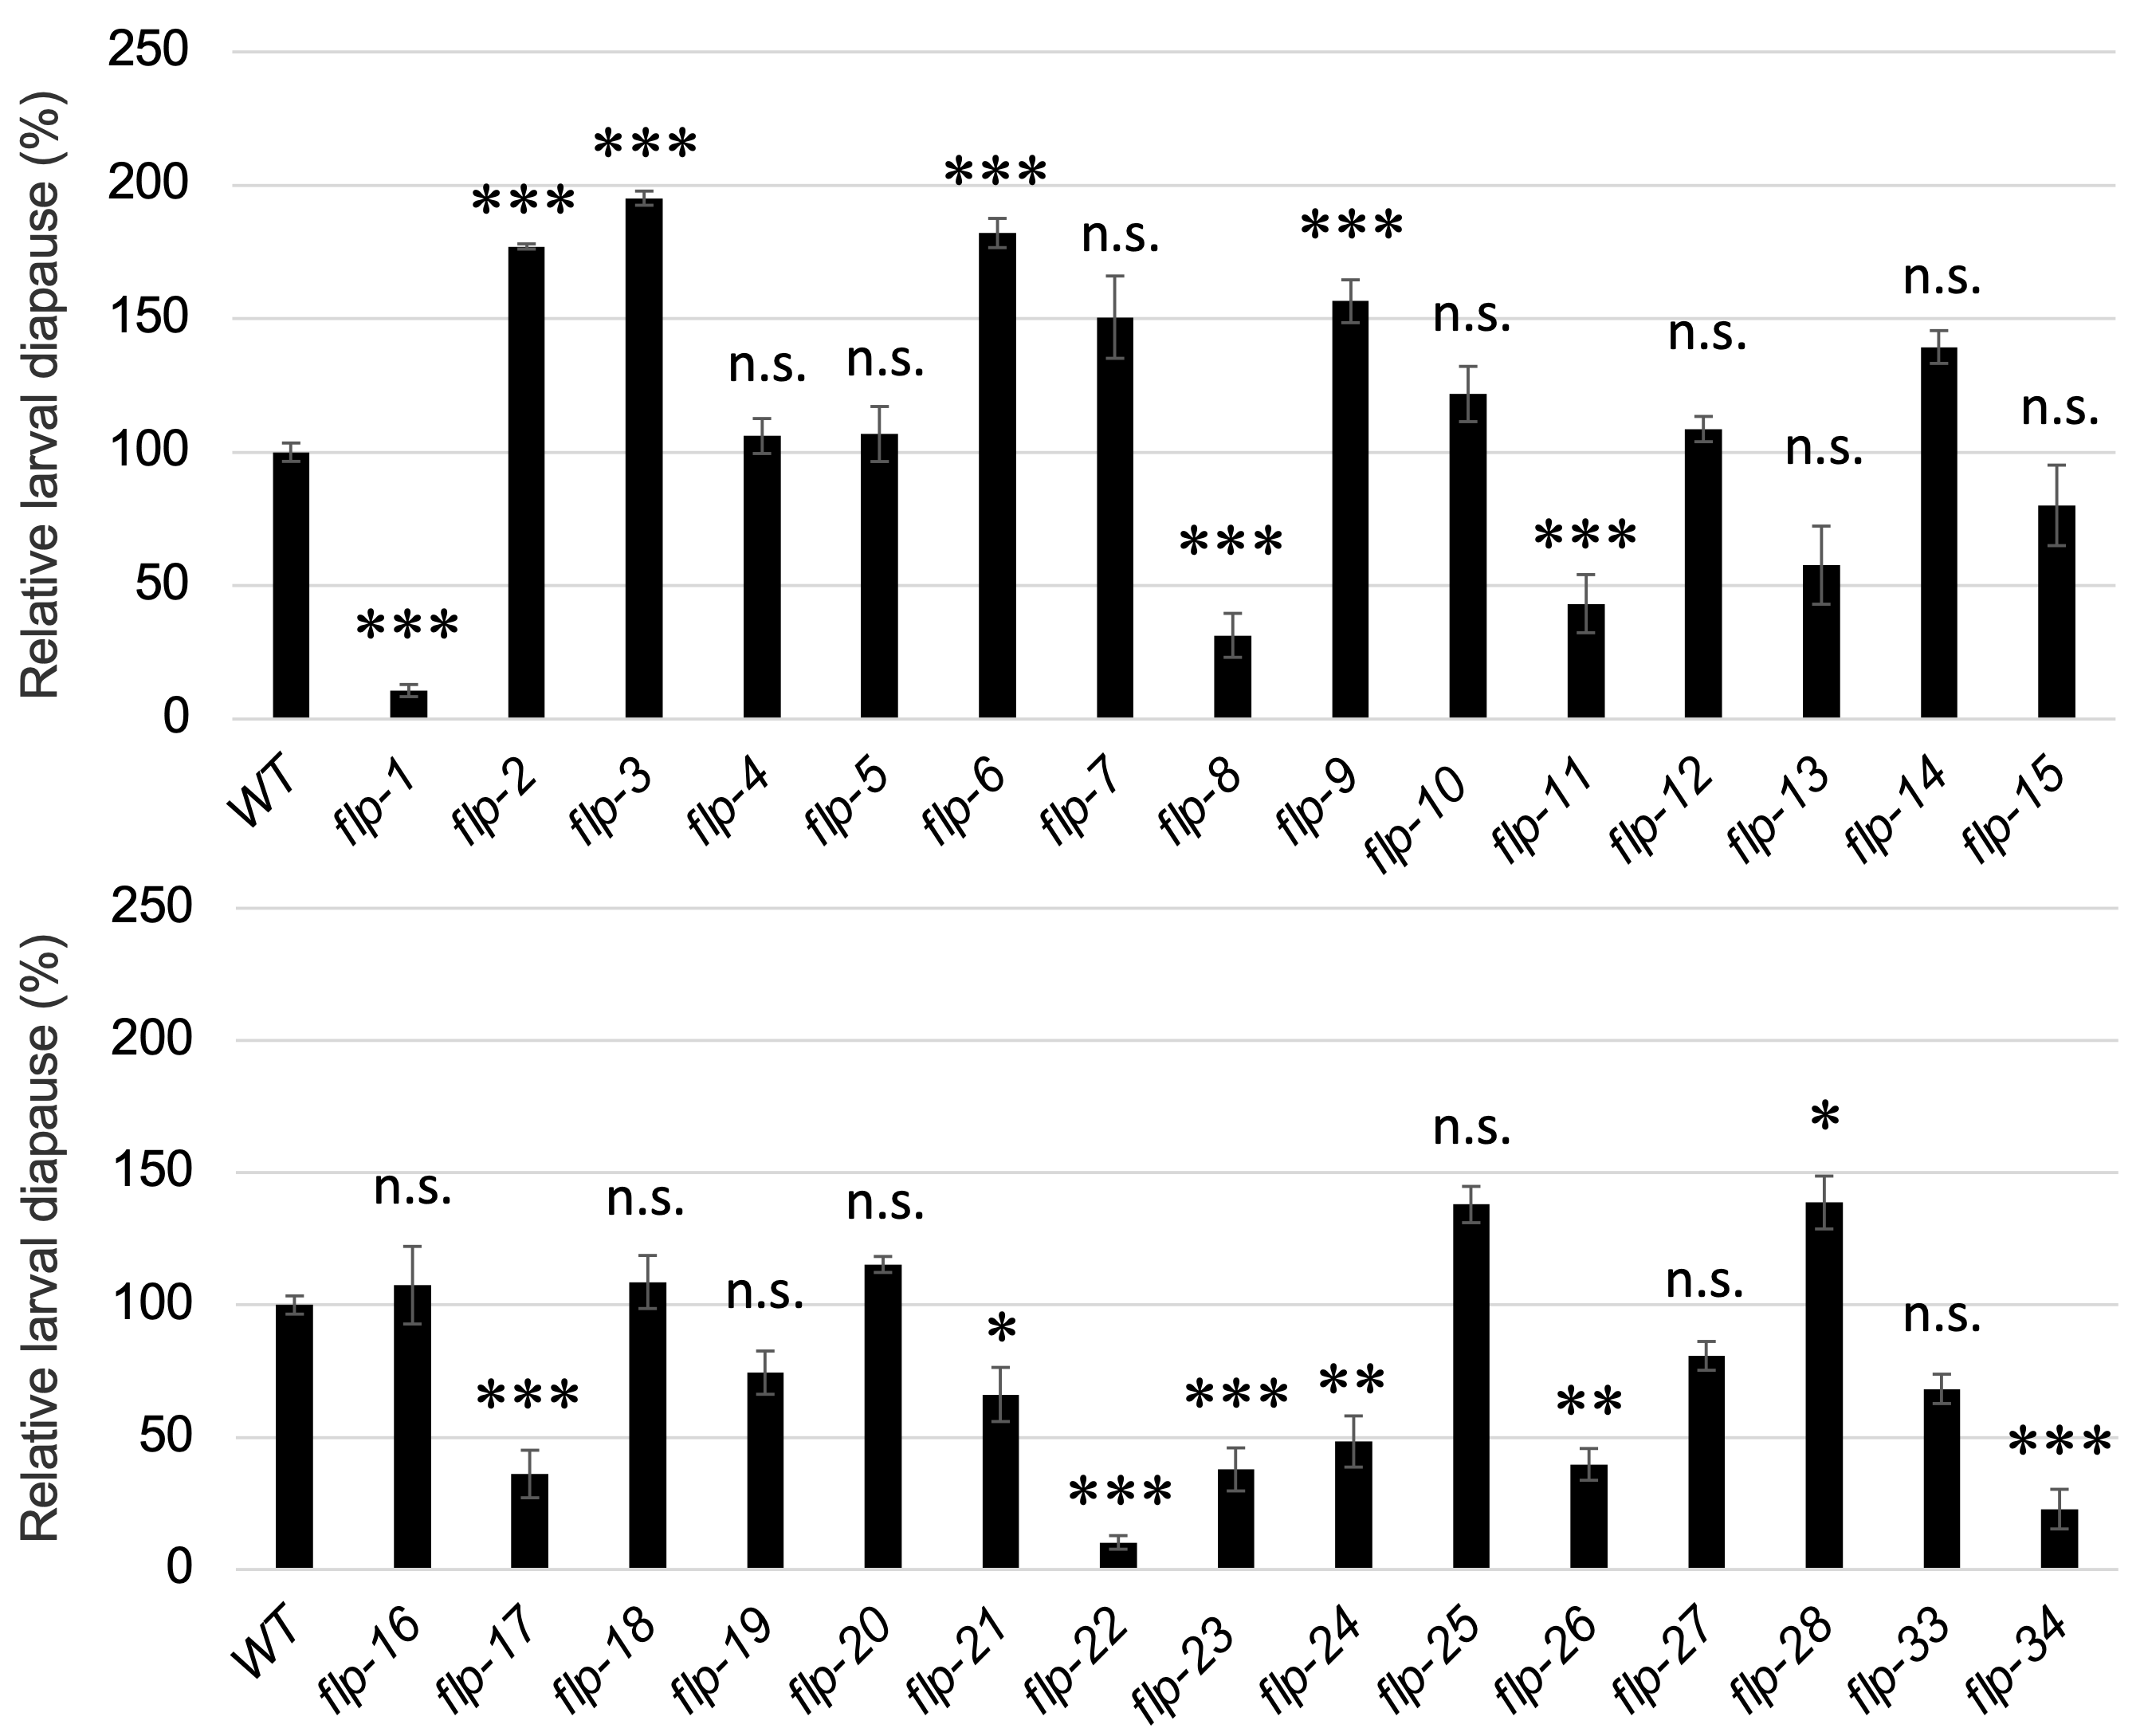


**Supplementary Figure 1. Relative dauer diapause of the worms losing each *flp* gene.**

The relative percentages of dauer formation in each knockout mutant, exposed to dauer-inducing pheromone, are compared to the wild-type strain. The deletion mutant nematodes were not outcrossed with the wild-type nematodes. Data are expressed as the mean ± SEM. **p* < 0.05, ***p* < 0.01, ****p* < 0.001. n.s., not significant. Multiple comparisons between groups were made using Dunnett’s test. Detailed parameters including numbers, trials, *p*-values, and values of mean ± SEM. are shown in Supplementary Table 3A.

**Supplementary Figure 2. Secretion of DAF-7::mCherry in each *flp*-disrupted nematode.**

**
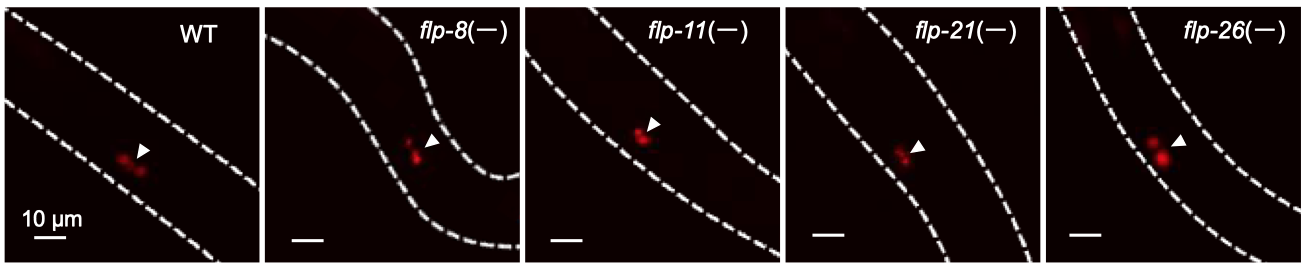
**

**
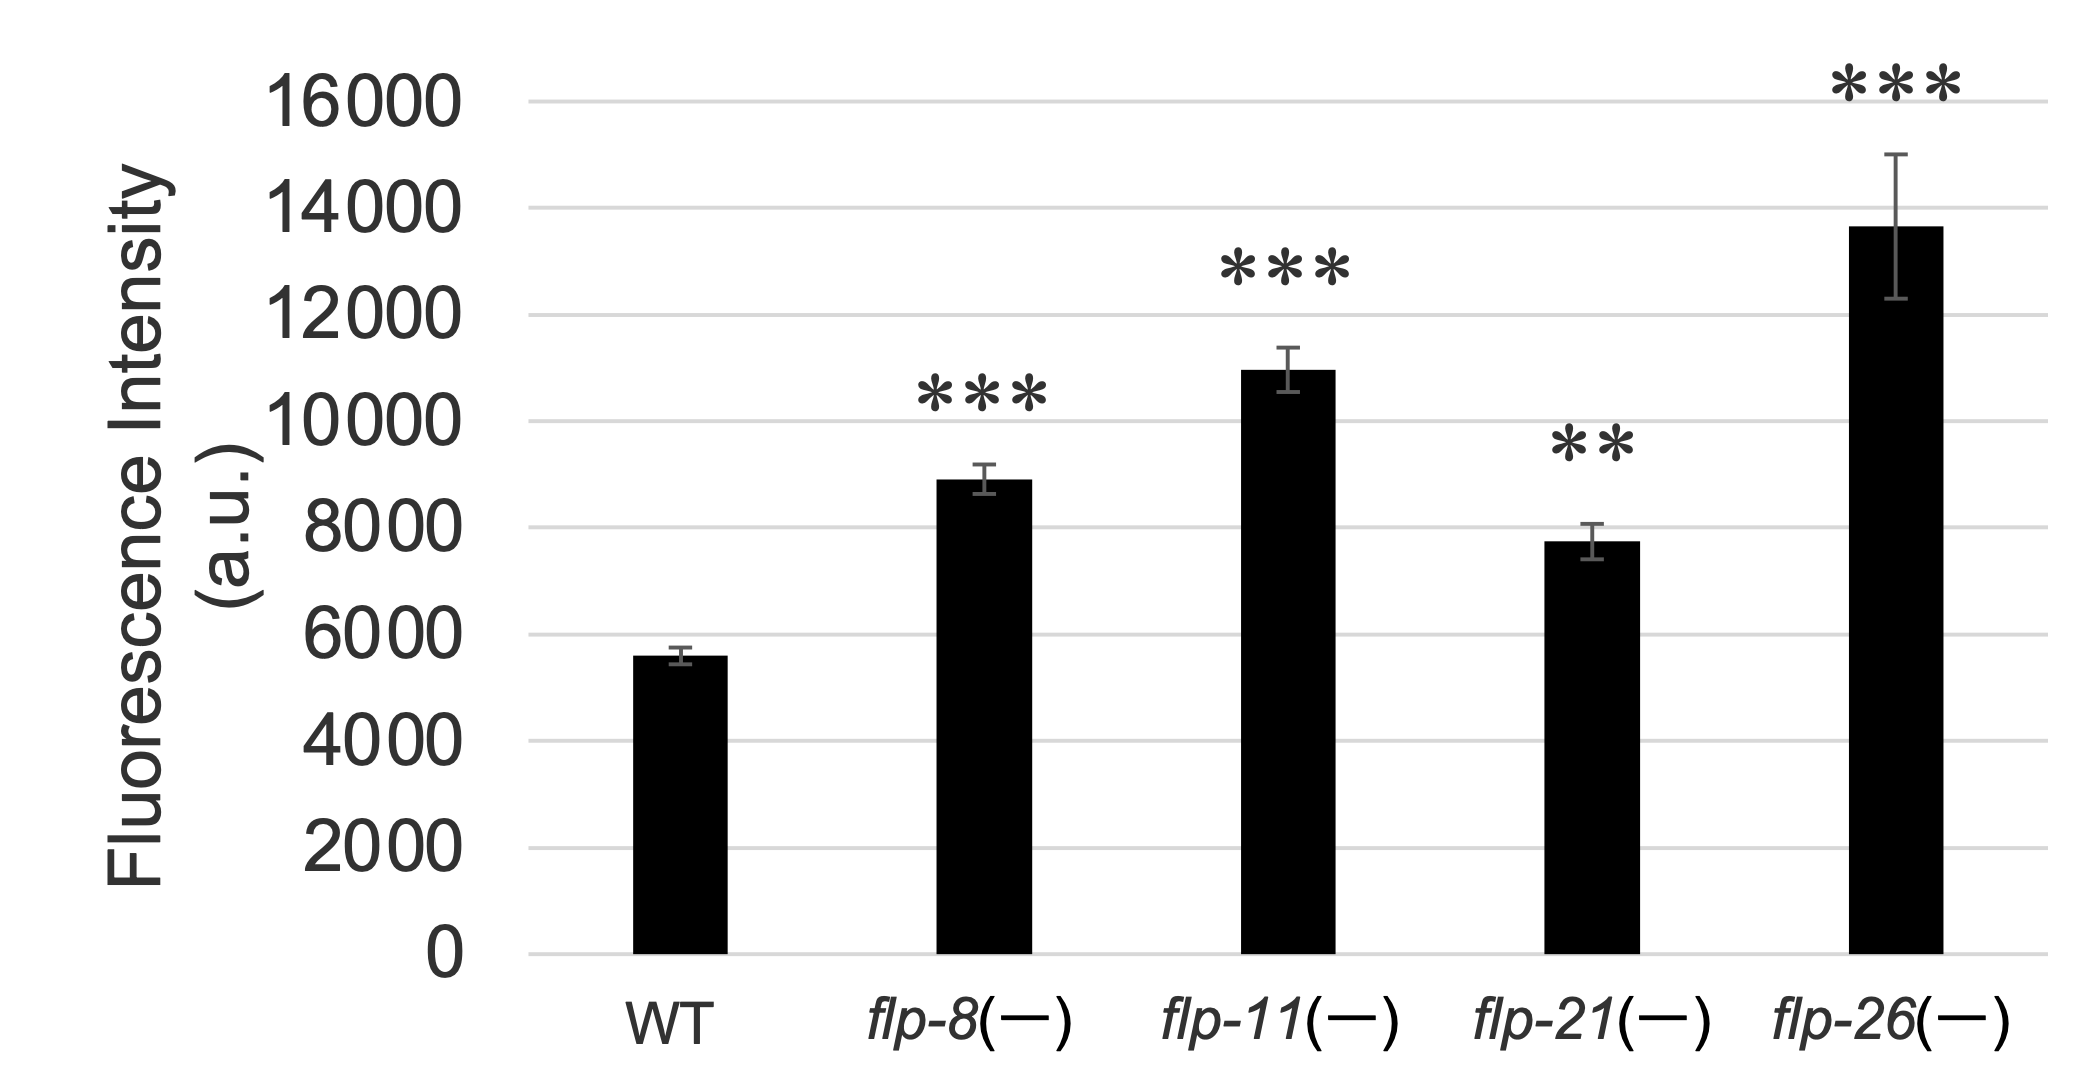
**

**
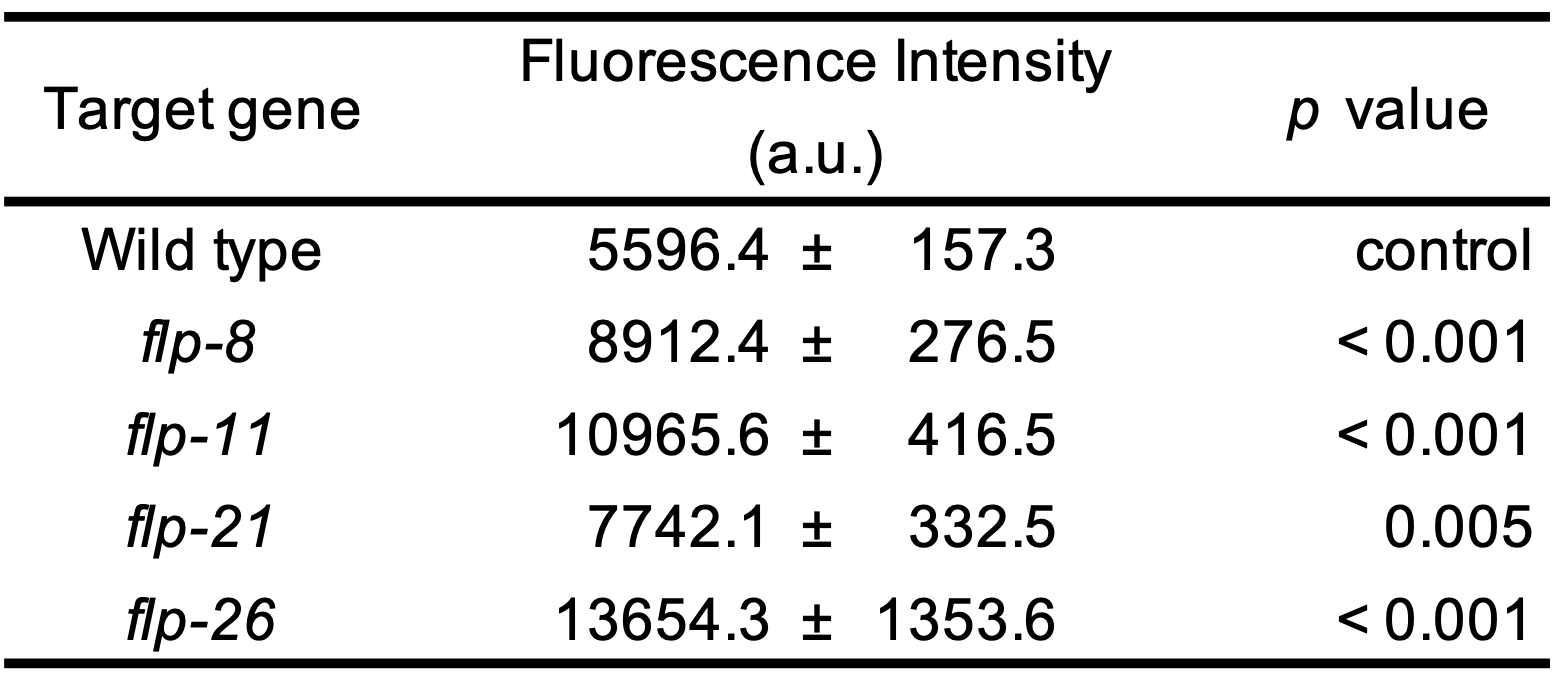
**

**Supplementary Figure 2. Secretion of DAF-7::mCherry in each *flp*-disrupted nematode.**

The secretion of DAF-7::mCherry into coelomocytes is indicated by arrowheads in the microscopic images. The fluorescence intensity of DAF-7::mCherry taken up by coelomocytes is presented in both the graph and the table. Data are expressed as the mean ± SEM. ***p* < 0.01, ****p* < 0.001. Multiple comparisons between groups were made using Dunnett’s test. Detailed parameters including *p*-values and values of mean ± SEM. are also shown. The respective fluorescence intensity under background of the *flp-9*, *flp-17*, *flp-22*, *flp-23*, *flp-24*, *flp-28*, and *flp-34* disruption is almost the same to that in the wild-type background (data not shown).

**Supplementary Figure 3. *flp-11* is not involved in the DAF-28 production and secretion.**

**(A) The DAF-28 production (B) The DAF-28 secretion**

**
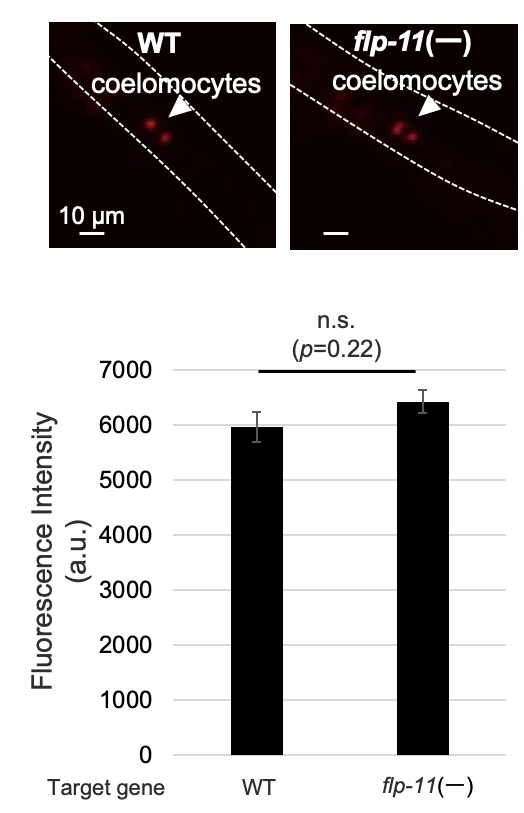

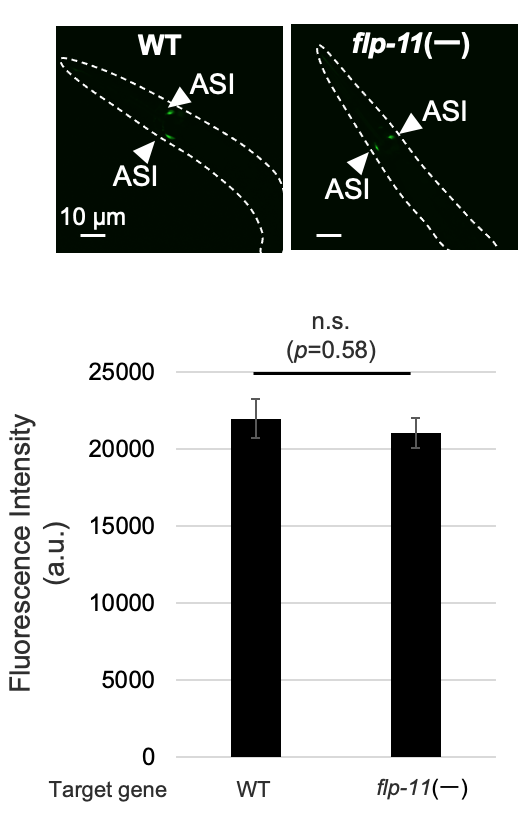
**

The GR1455(*mgIs44)* nematodes, expressing stably *daf-28p*::GFP and the tmIs4109 nematodes, expressing stably *daf-28p*::DAF-28::mCherry were crossed with *flp-11*(*tm2706*) nematodes, respectively. The fluorescent intensity of the GFP, representing DAF-28 production, and that of the mCherry, representing DAF-28 secretion, were compared. A comparison between groups was made using Student’s *t*-tests. Data are expressed as mean ± SEM. n.s., not significant. n = 5.

**Supplementary Figure 4. *npr-22* is not involved in the DAF-28 secretion.**

**
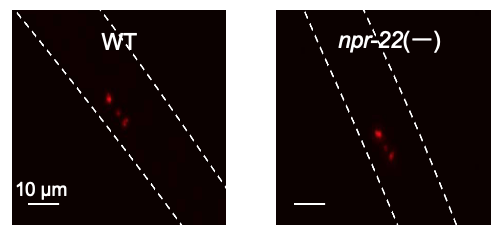
**

**
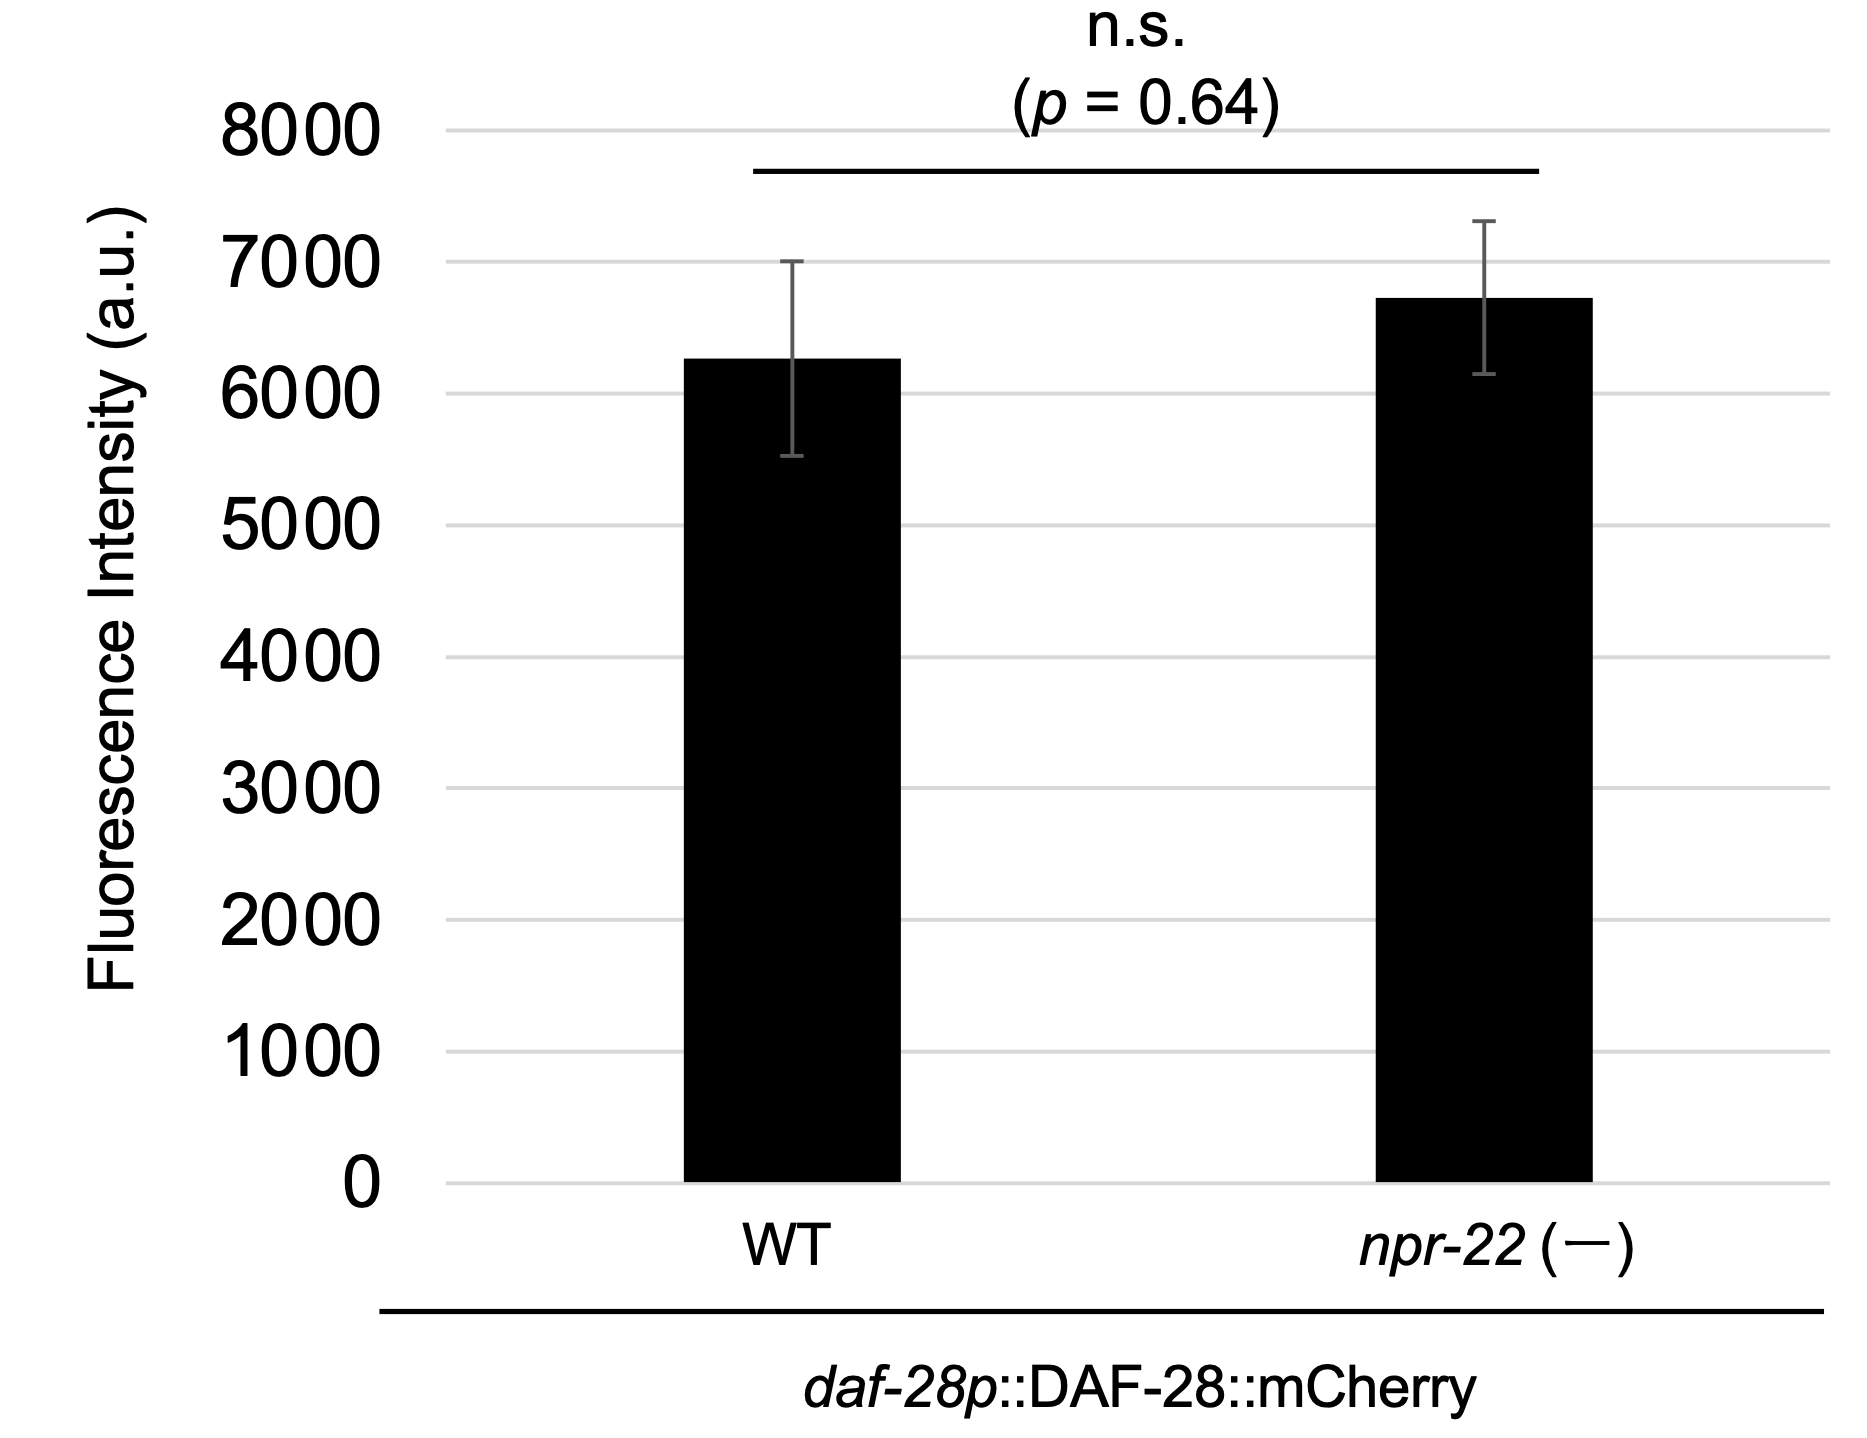
**

The tmIs4109 nematodes, expressing stably *daf-28p*::DAF-28::mCherry were crossed with *npr-22*(*tm8953*) nematodes. The fluorescent intensity of the mCherry, representing DAF-28 secretion, was compared. A comparison between groups was made using Student’s *t*-tests. Data are expressed as mean ± SEM. n.s., not significant. n = 5.

**Supplementary Table 1. The list of mutant nematodes used in this study.**


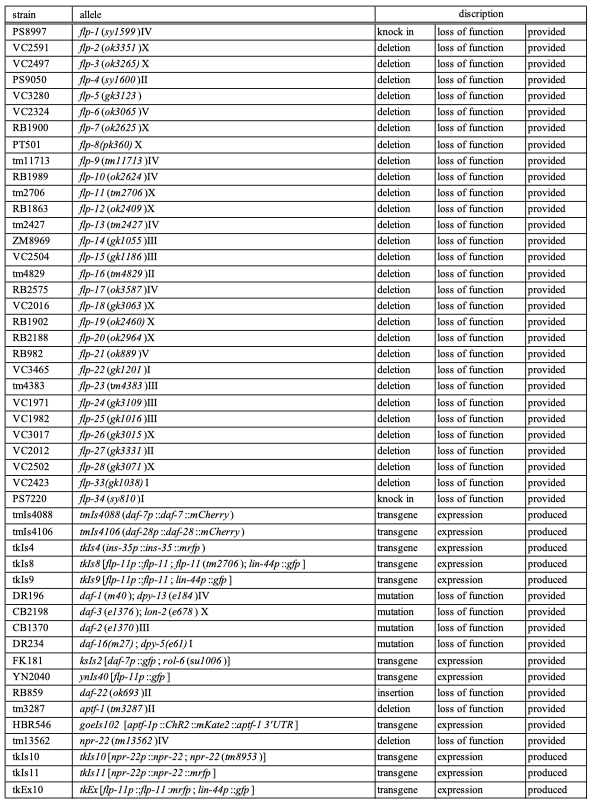


**Supplementary Table 2. The sequences of PCR primers used in this study.**


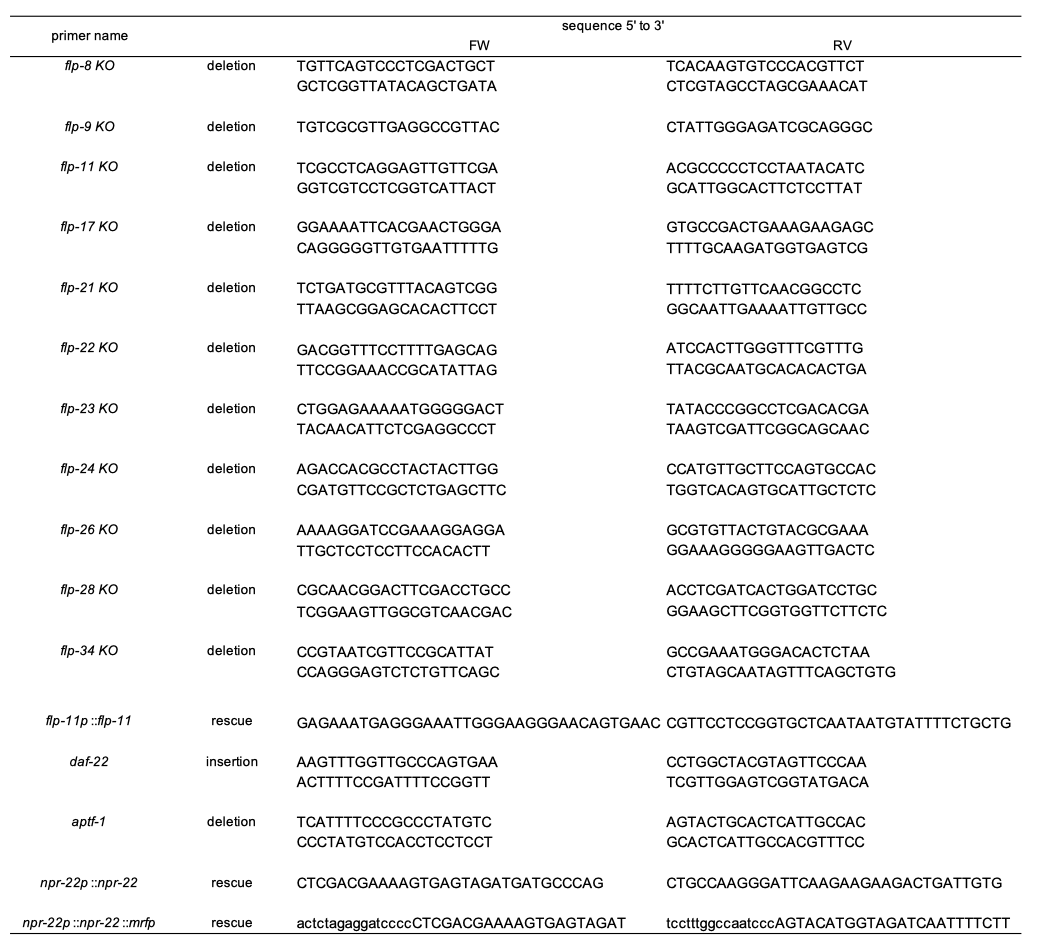


**Supplementary Table 2. The sequences of PCR primers used in this study.**

The sequences of PCR primers used for detection of deletion/insertion and for construction of transgene are shown. The sequences consisting of small letters were utilized for an In-Fusion reaction.

**Supplementary Table 3A. Dauer diapause of the nematodes losing each *flp* gene.**

**
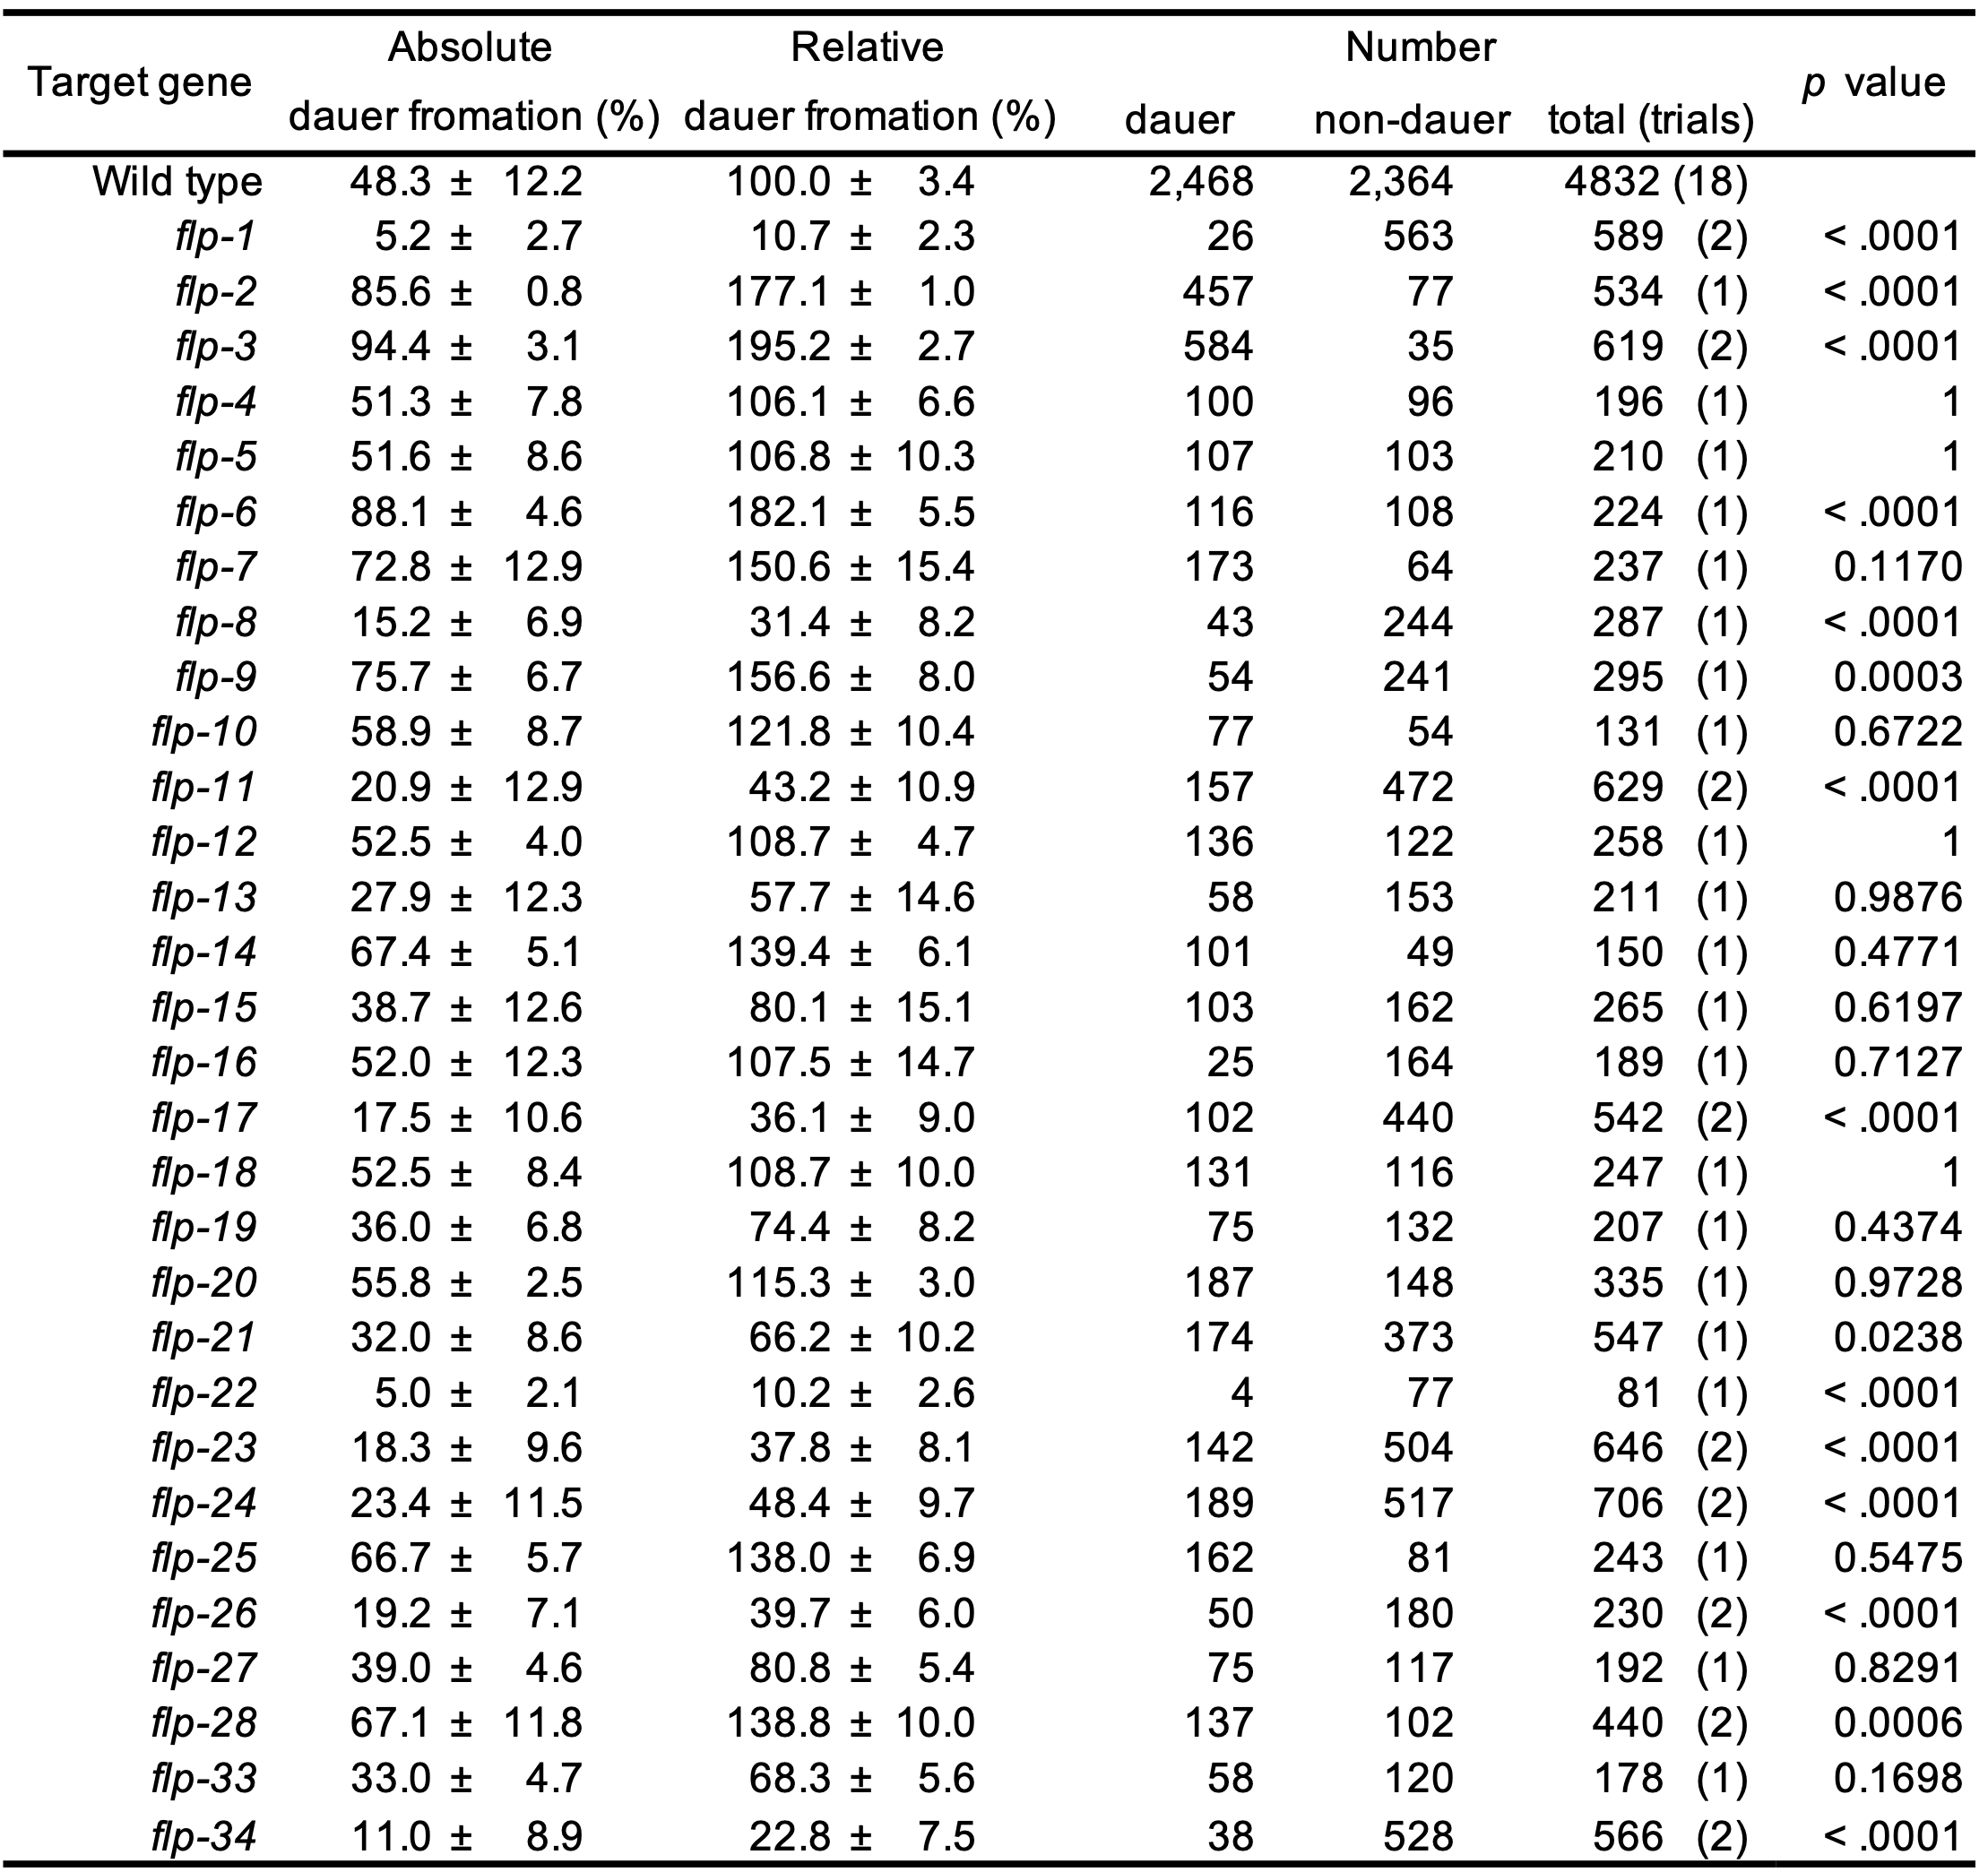
**

**Supplementary Table 3A. Dauer diapause of the worms losing each *npr* gene.**

The percentages of dauer formation in each deletion mutant in the presence of dauer-inducing pheromone, in comparison to the wild type, are presented. For every dauer formation assay, 3-4 autonomous plates were examined. Data are represented as the mean ± SEM.

**Supplementary Table 3B. The *flp-11* gene is involved in modulation of dauer diapause.**

**(Figure 1D)**


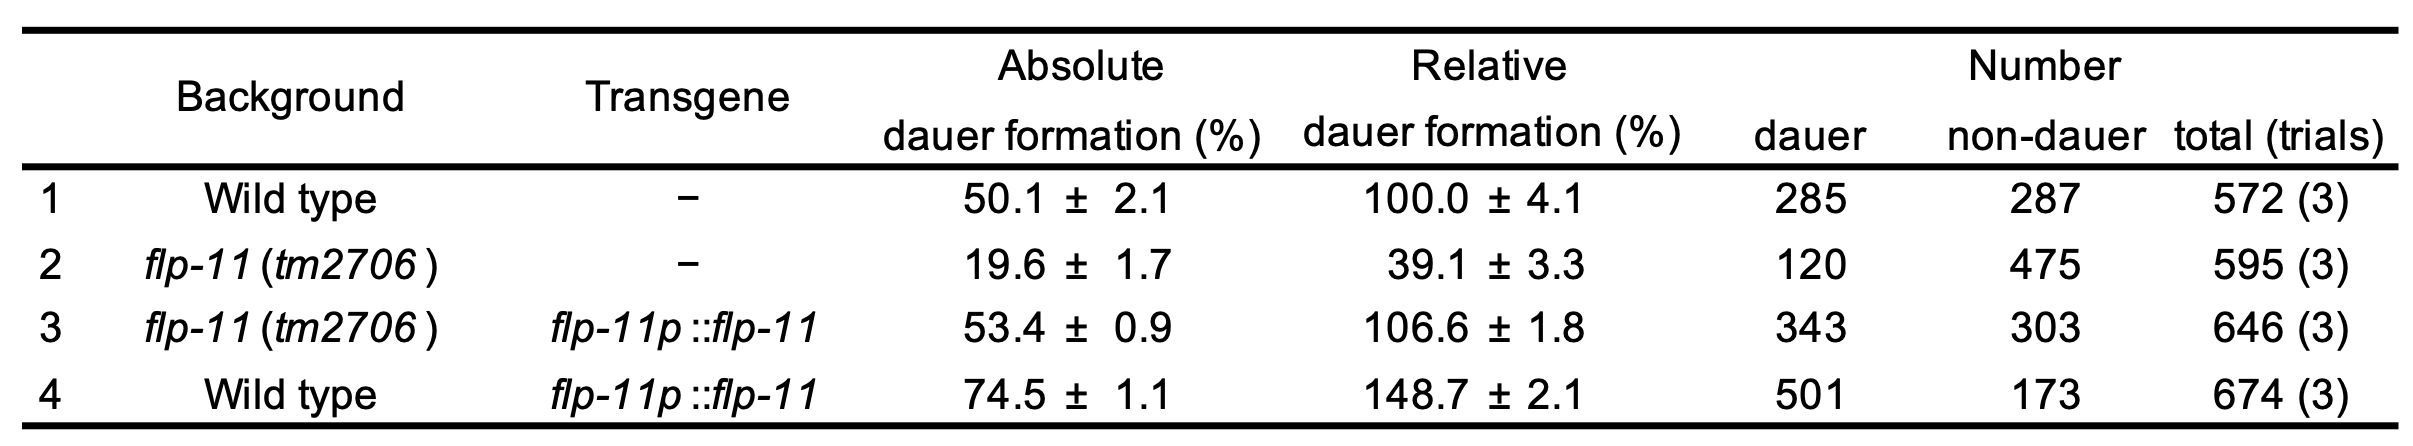


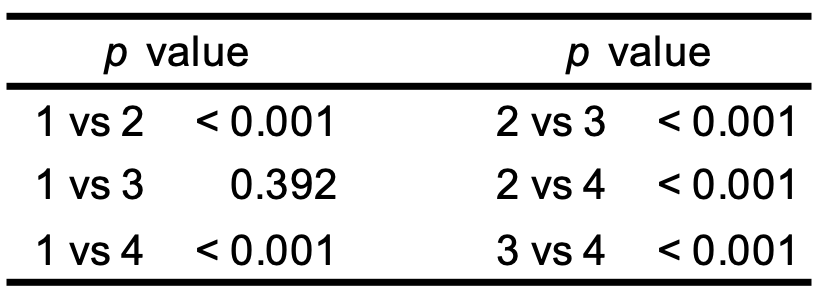


**Supplementary Table 3B. The *flp-11* gene is involved in modulation of dauer diapause.**

The relative percentages of dauer formation in each mutant nematode, when compared to wild-type, in the presence of dauer pheromone. Detailed parameters, including raw data, trials, *p* values, and mean ± SEM are shown.

**Supplementary Table 3C. The *npr-22* gene is involved in modulation of dauer diapause.**

**(Figure 1F)**

**
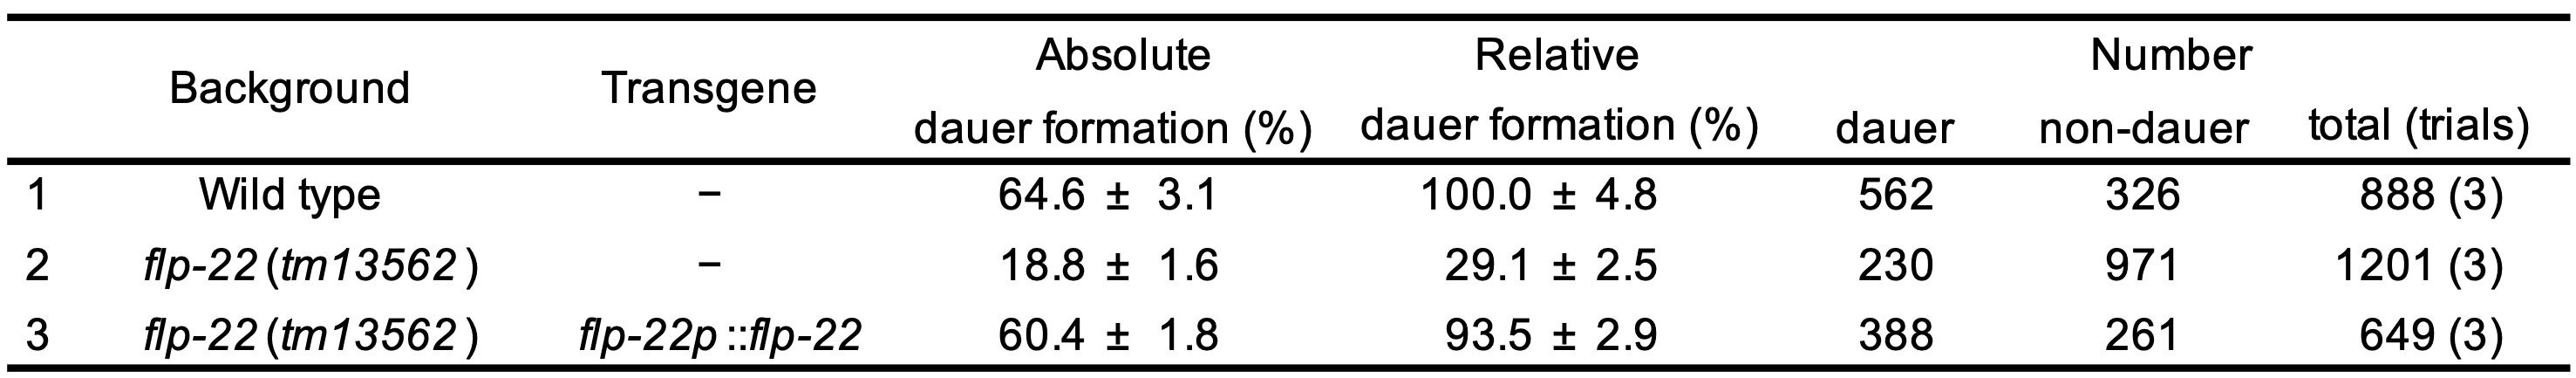
**

**
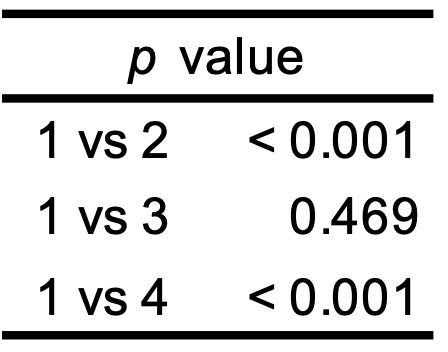
**

**Supplementary Table 3C. The *npr-22* gene is involved in modulation of dauer diapause.**

The relative percentages of dauer formation in each mutant nematode, when compared to wild-type, in the presence of dauer pheromone. Detailed parameters, including raw data, trials, *p* values, and mean ± SEM are shown.

**Supplementary Table 3D. The *npr-22* gene is located downstream of the *flp-11* gene to regulate larval development. (Figure 1G)**

The relative percentages of dauer formation in each mutant nematode, when compared to wild-type, in the presence of dauer pheromone. Detailed parameters, including raw data, trials, *p* values, and mean ± SEM are shown.

***flp-11* over-expression vs *npr-22* defect (Fig. 1G left)**

**
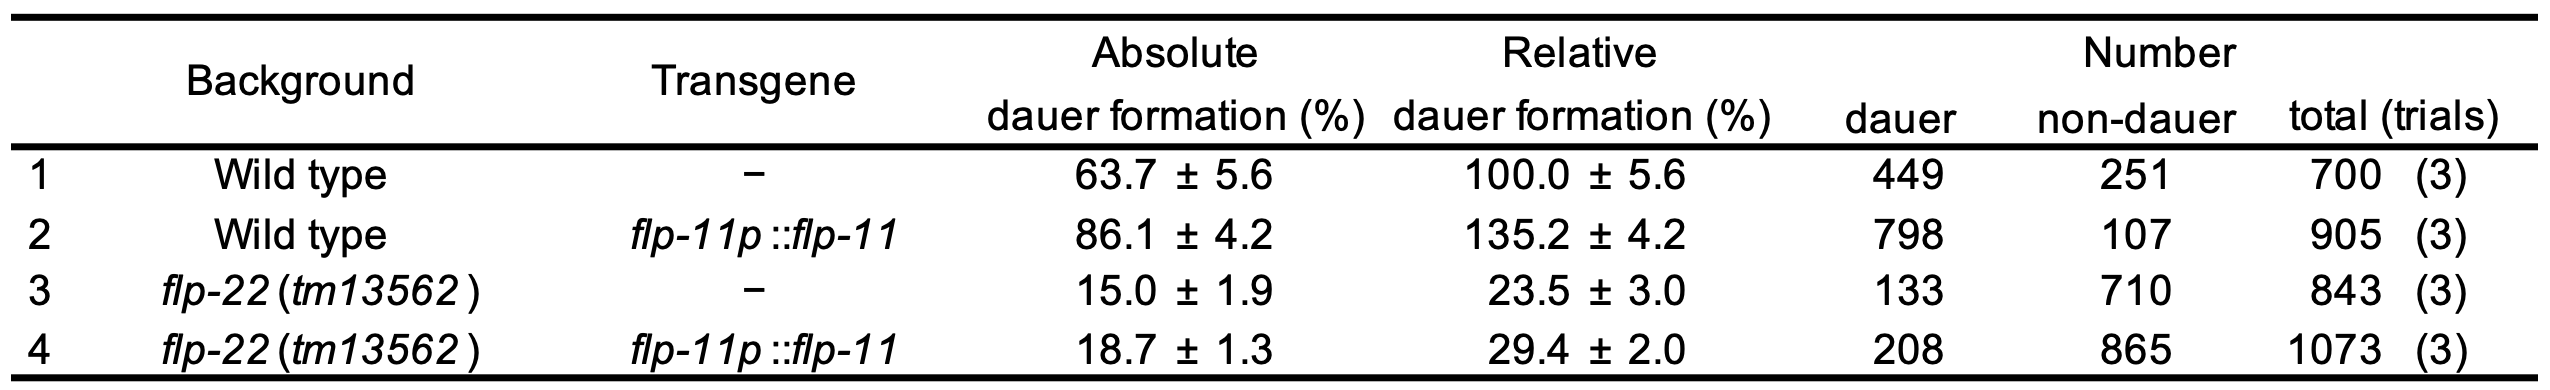
**


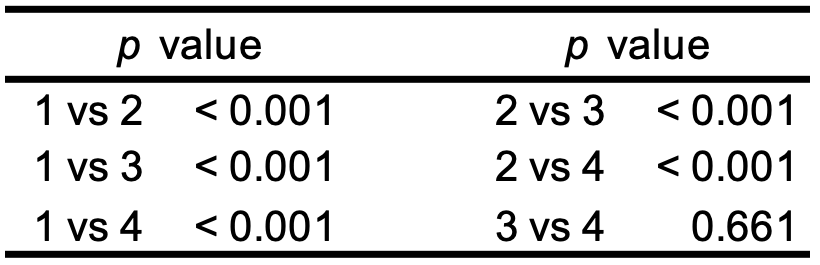


***npr-22* defect and *flp-11* defect showed no additive effect on dauer diapause (Fig. 1G right)**

**
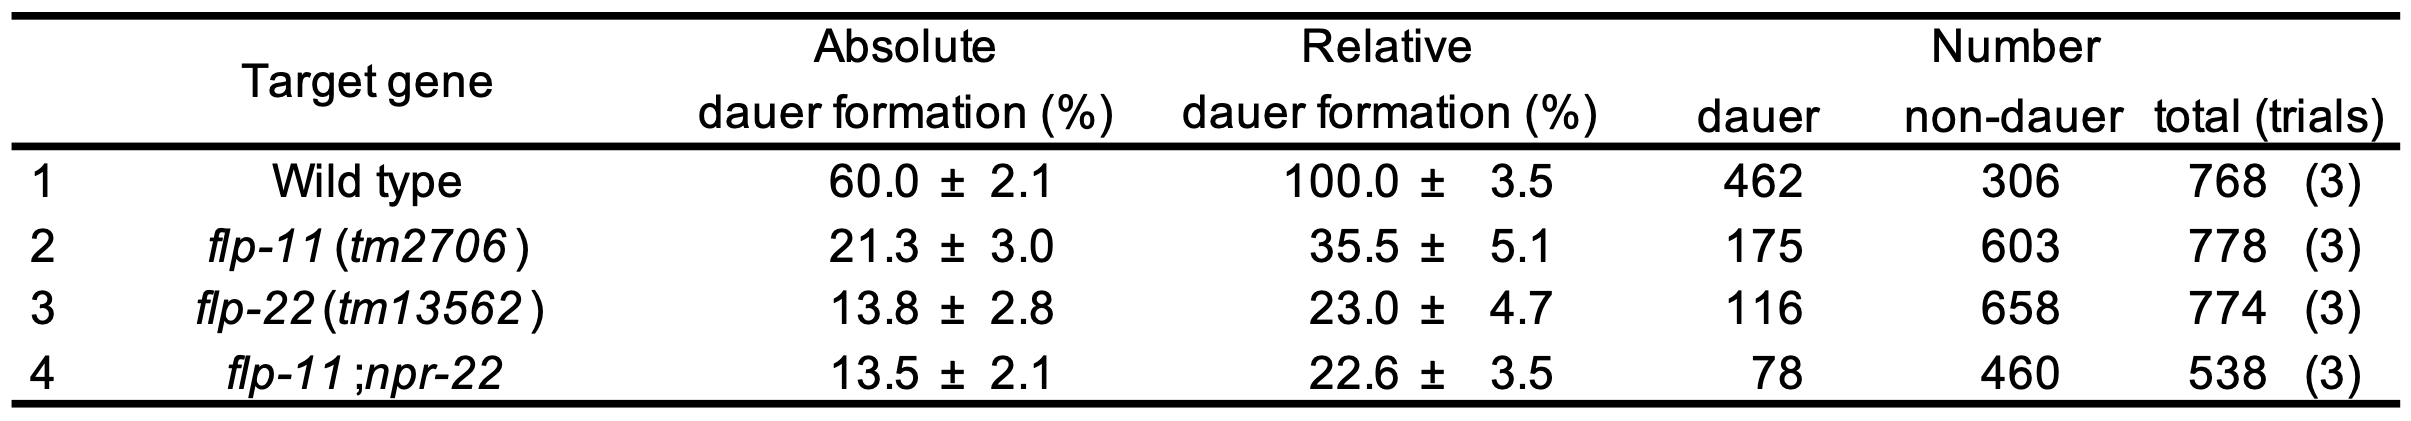
**

**
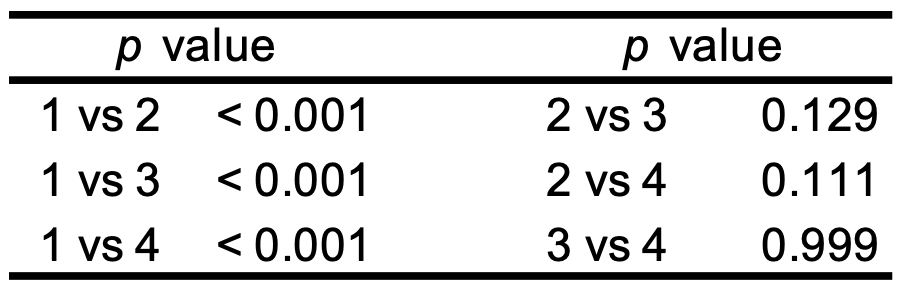
**

**Supplementary Table 3E. *flp-11* vs *daf-1*. (Figure 3A)**


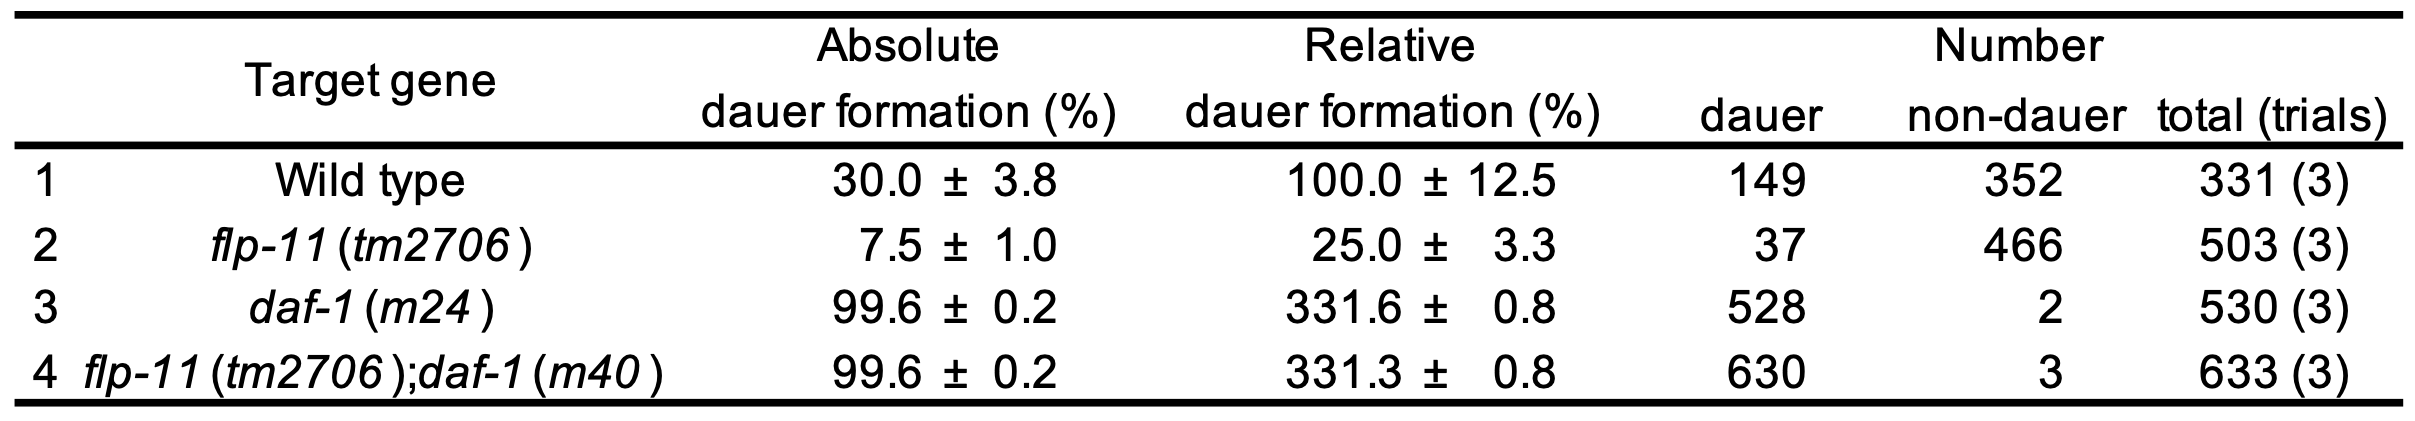


**
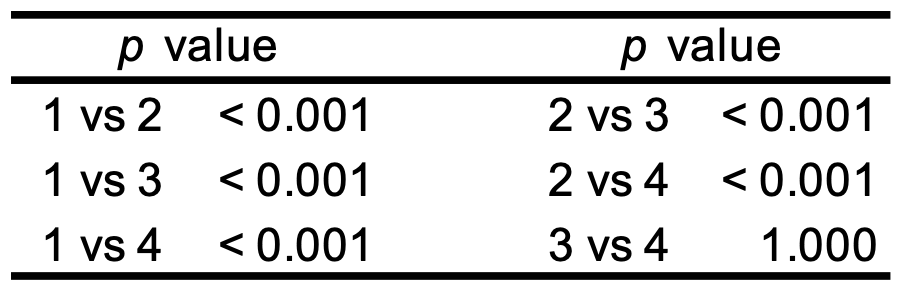
**

**Supplementary Table 3F. *flp-11* vs *daf-2*. (Figure 3B)**

**
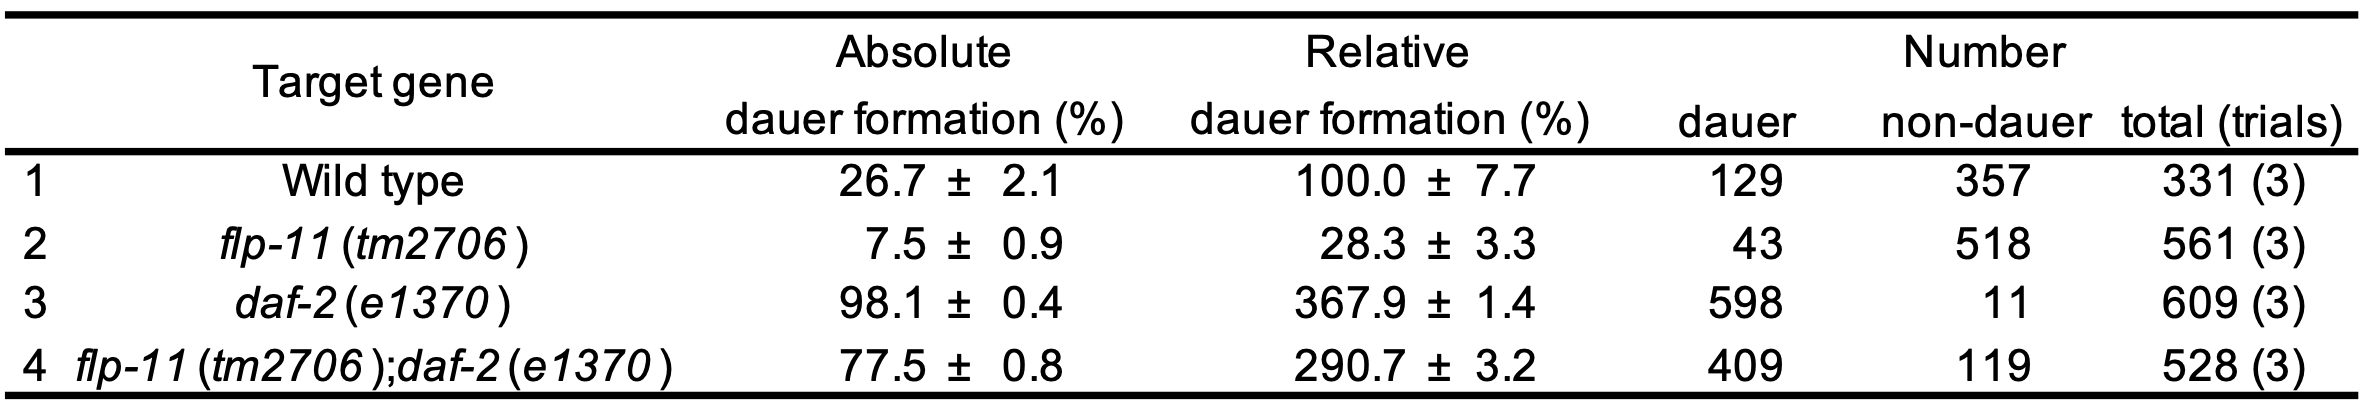
**

**
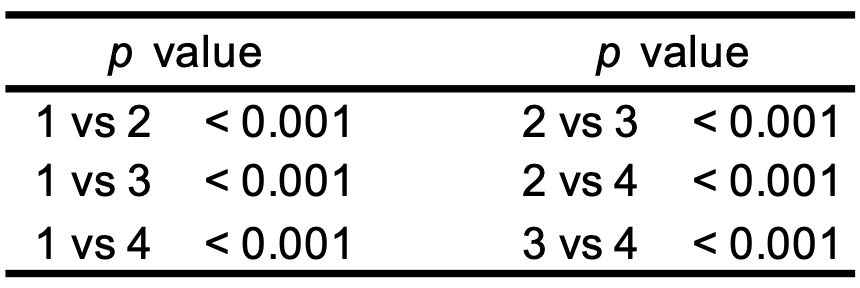
**

**Supplementary Table 3G. *flp-11* vs *daf-3*. (Figure 3C)**


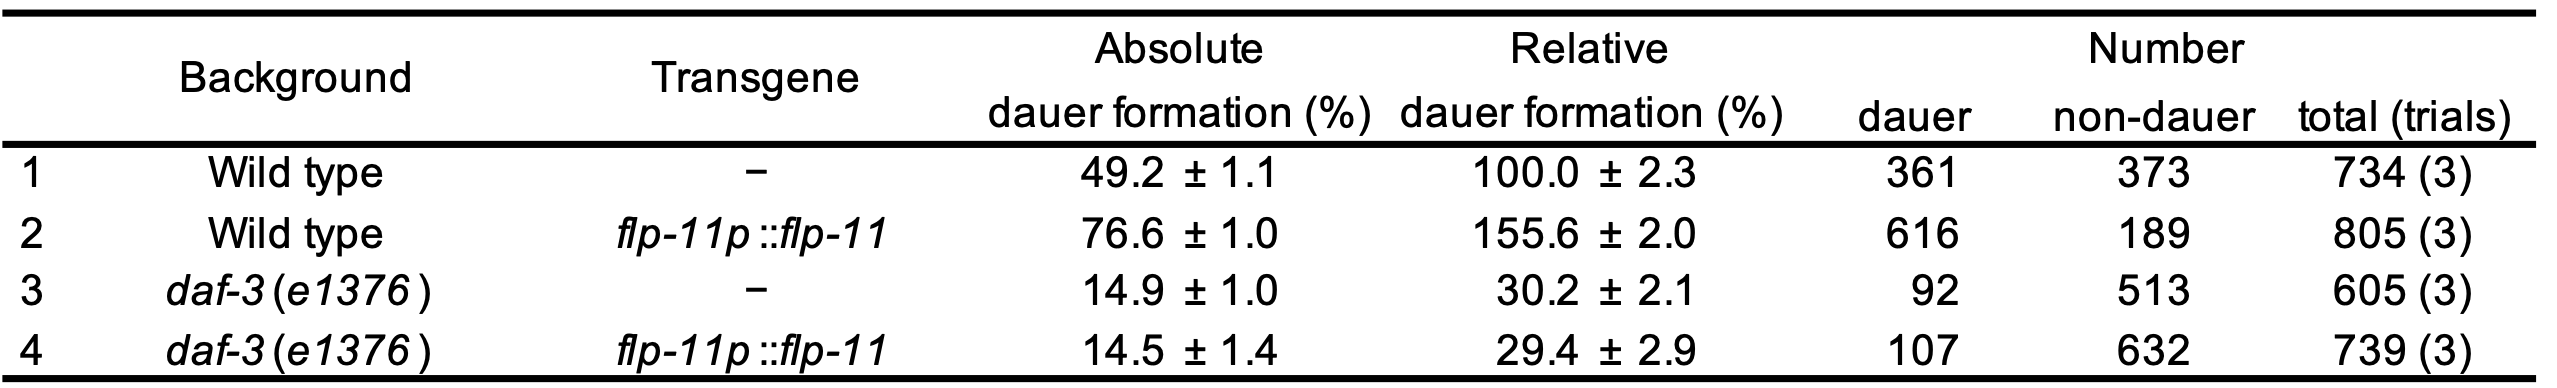


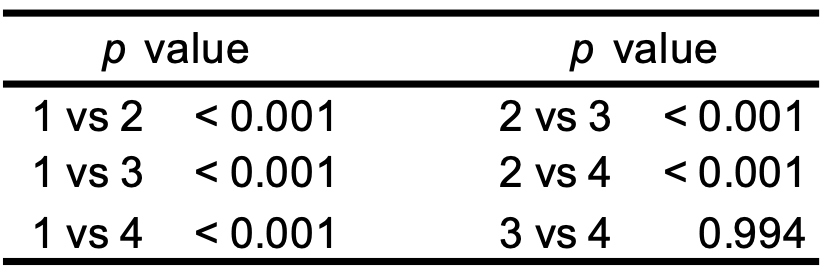


**Supplementary Table 3H. *flp-11* vs *daf-16*. (Figure 3D)**


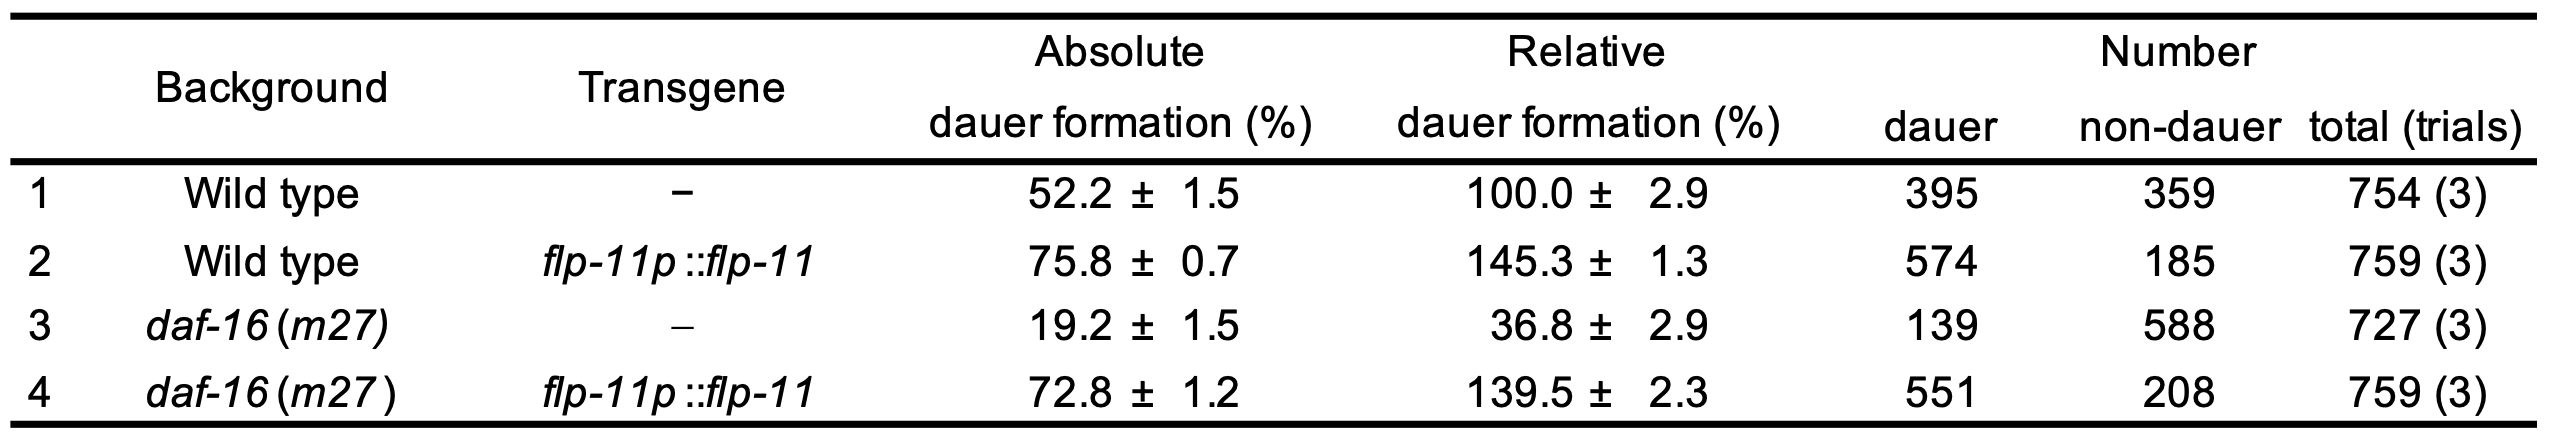


**
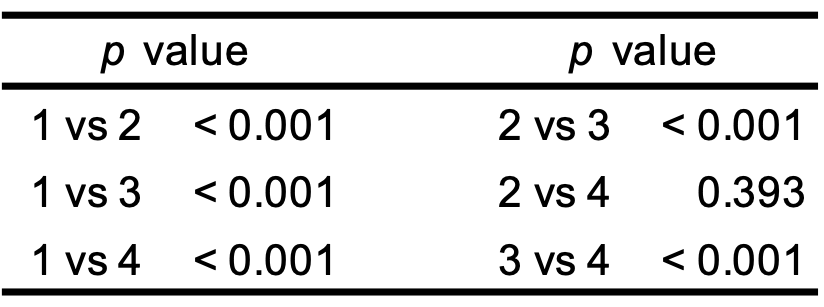
**

**Supplementary Table 3I. The *aptf-1* is not involved in larval development.(Figure 6B)**

**
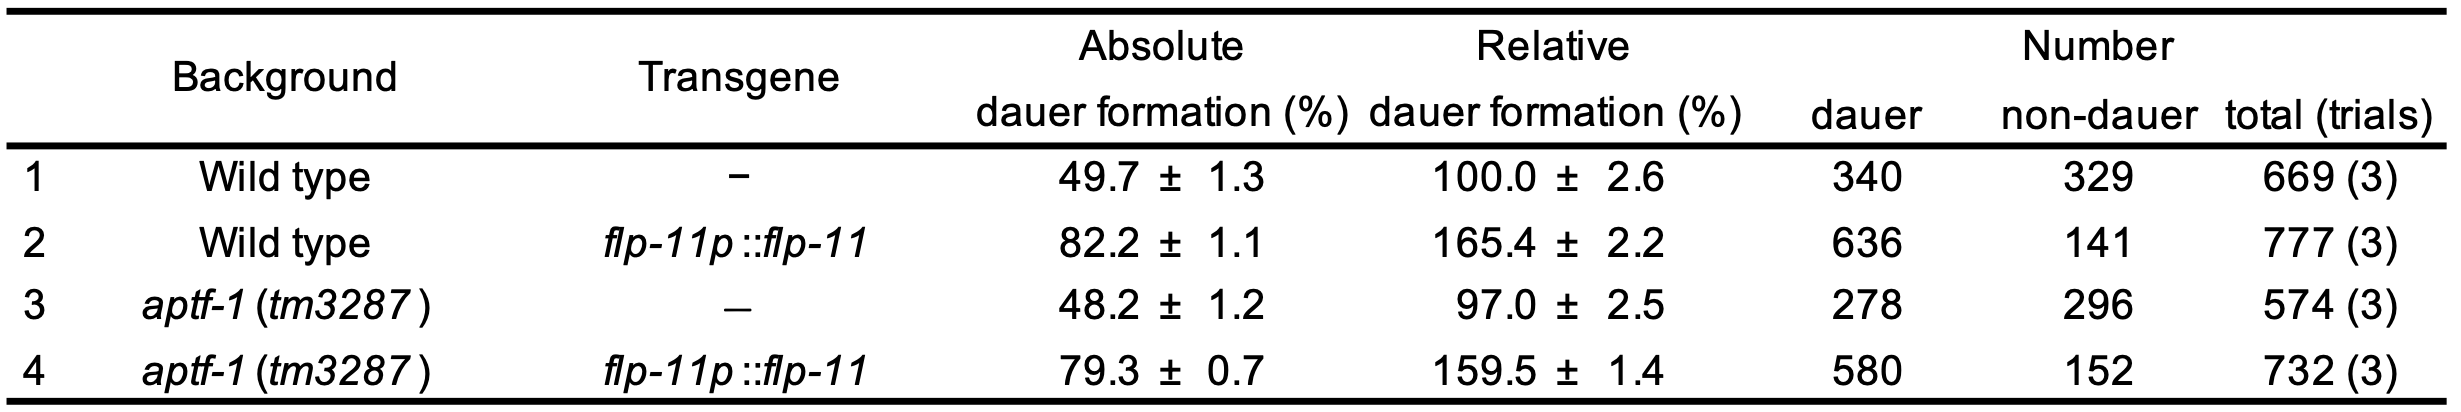
**

**
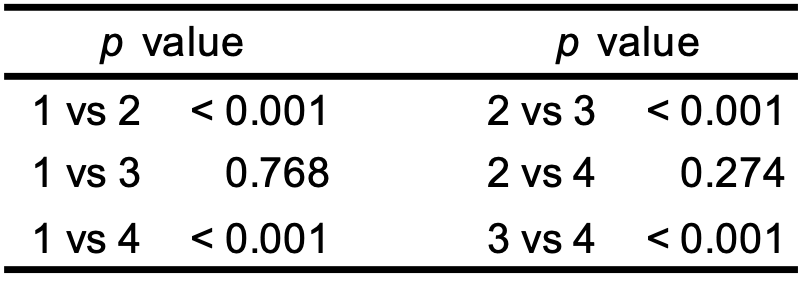
**

**Supplementary Table 4A. DAF-7 secretion. (Figure 2A)**


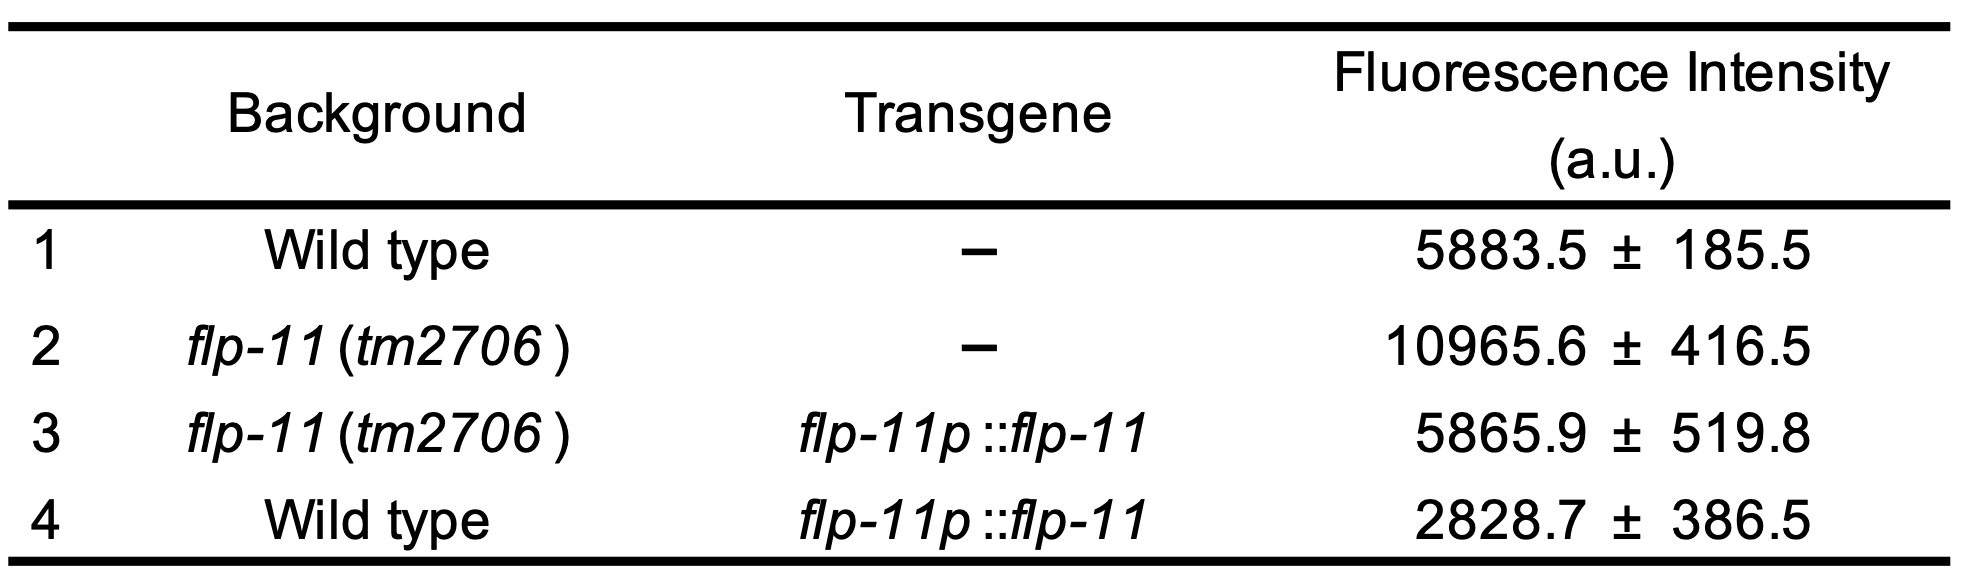


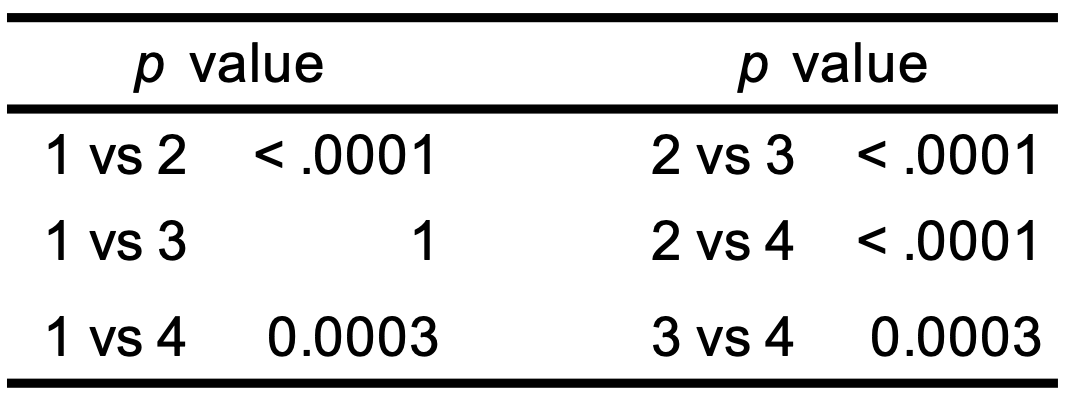


**Supplementary Table 4B. DAF-7 production. (Figure 2B)**


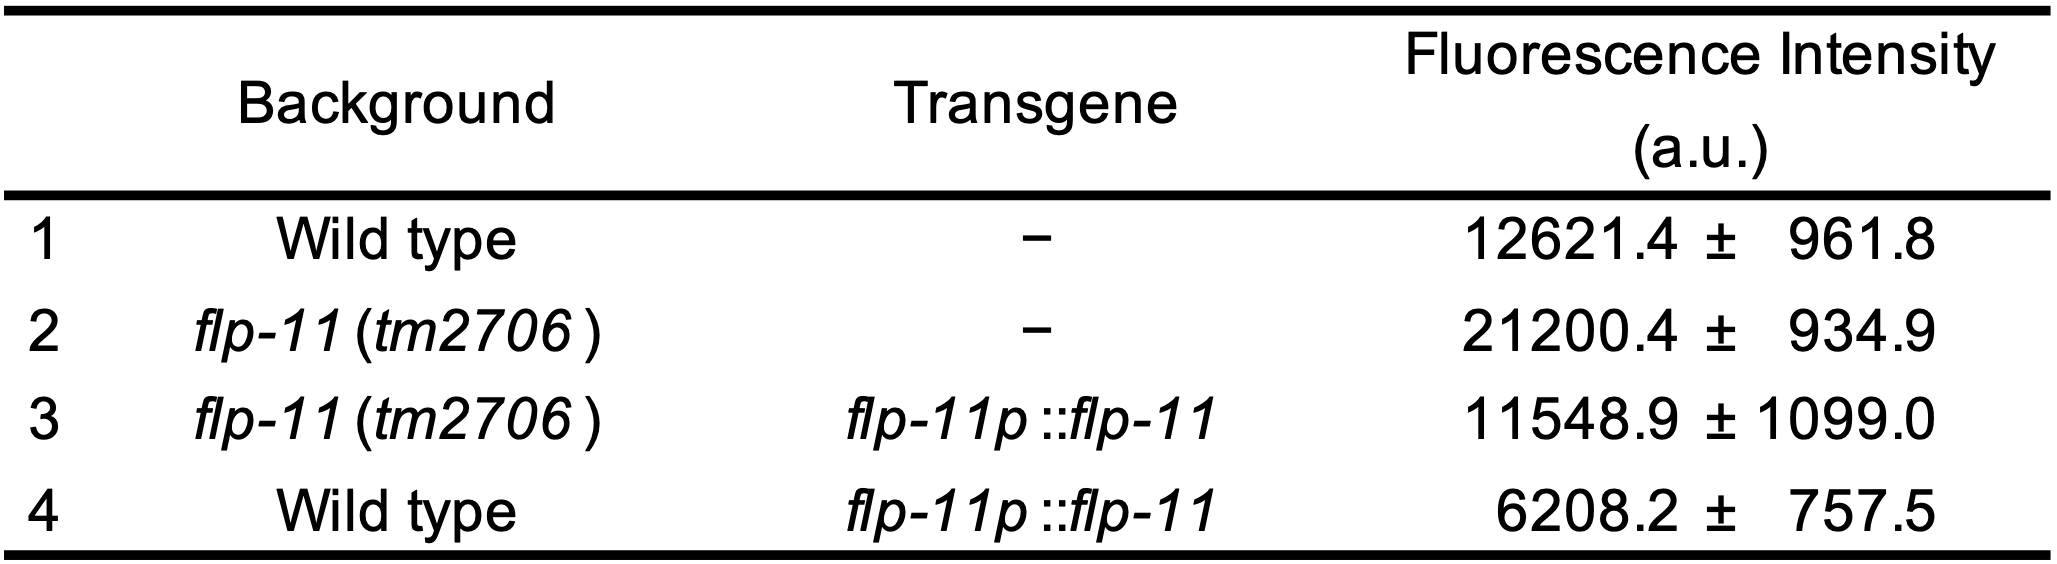


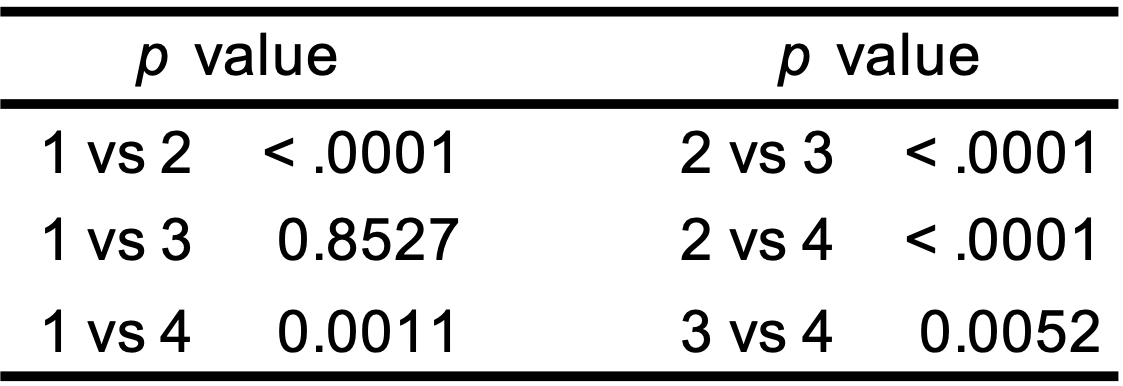


**Supplementary Table 4C. The fluorescence intensity of *flp-11p*::GFP in several neurons.**

**(Figure 4)**

**
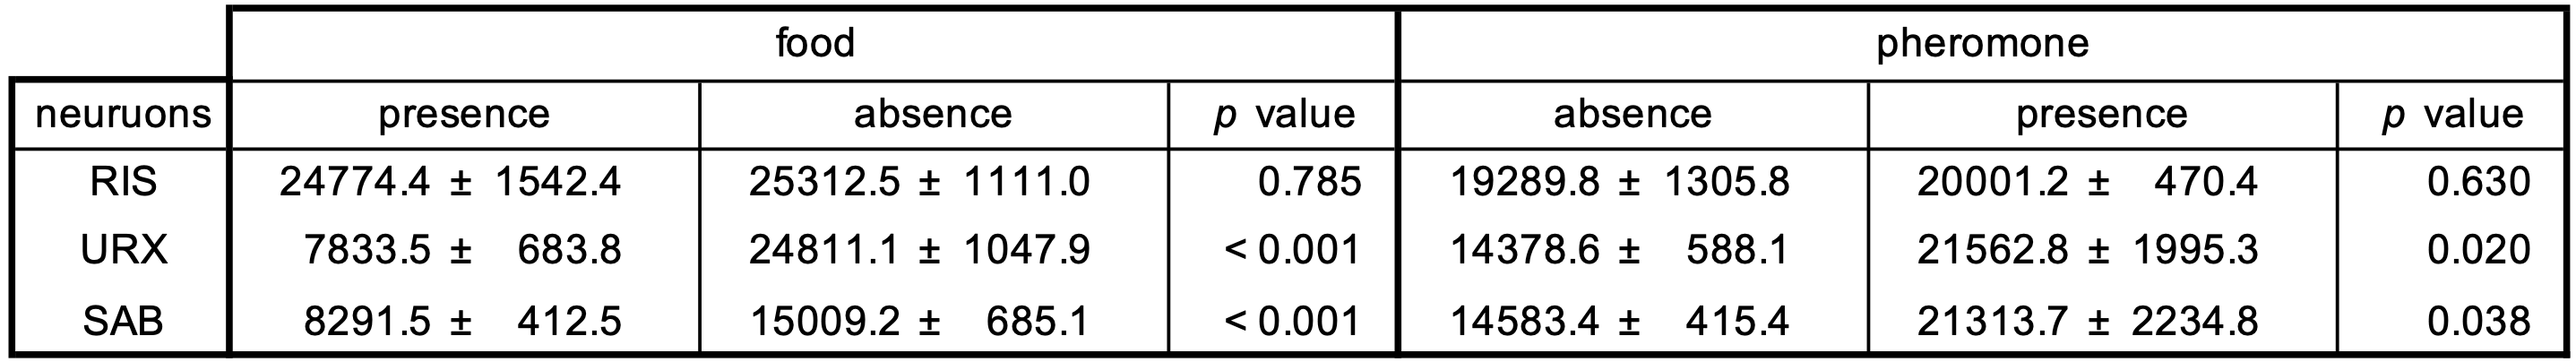
**

**Supplementary Table 4D. Effect of food and dauer pheromones on the secretion of FLP-11. (Figure 5)**

**Effect of food on FLP-11 secretion (Figure 5 A)**

**
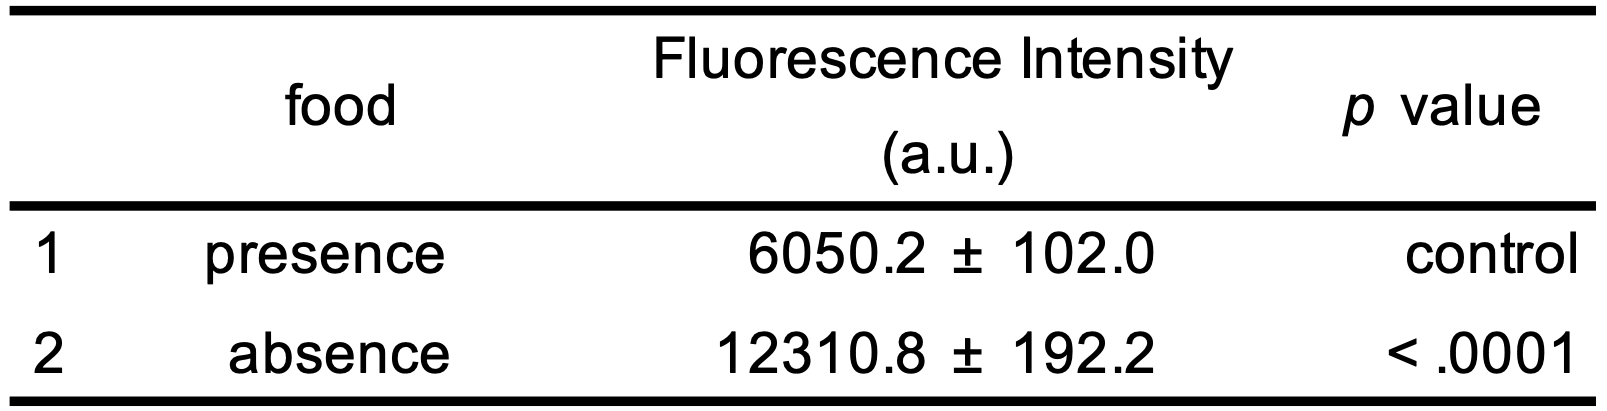
**

**Effect of pheromone on FLP-11 secretion (Figure 5 B)**

**
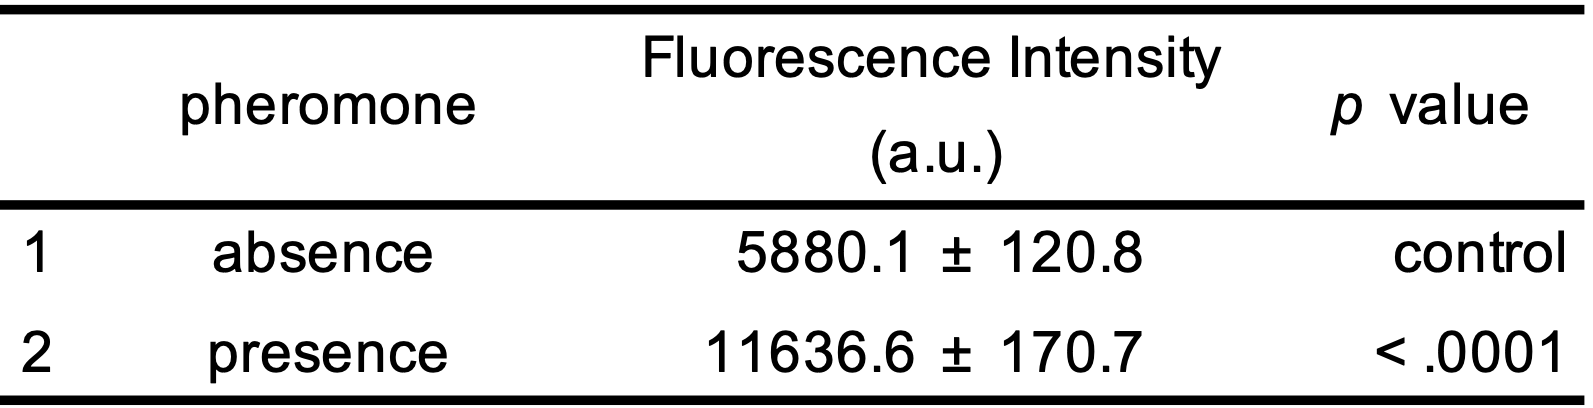
**

**Supplementary Table 4E. (Figure 6A)**

**
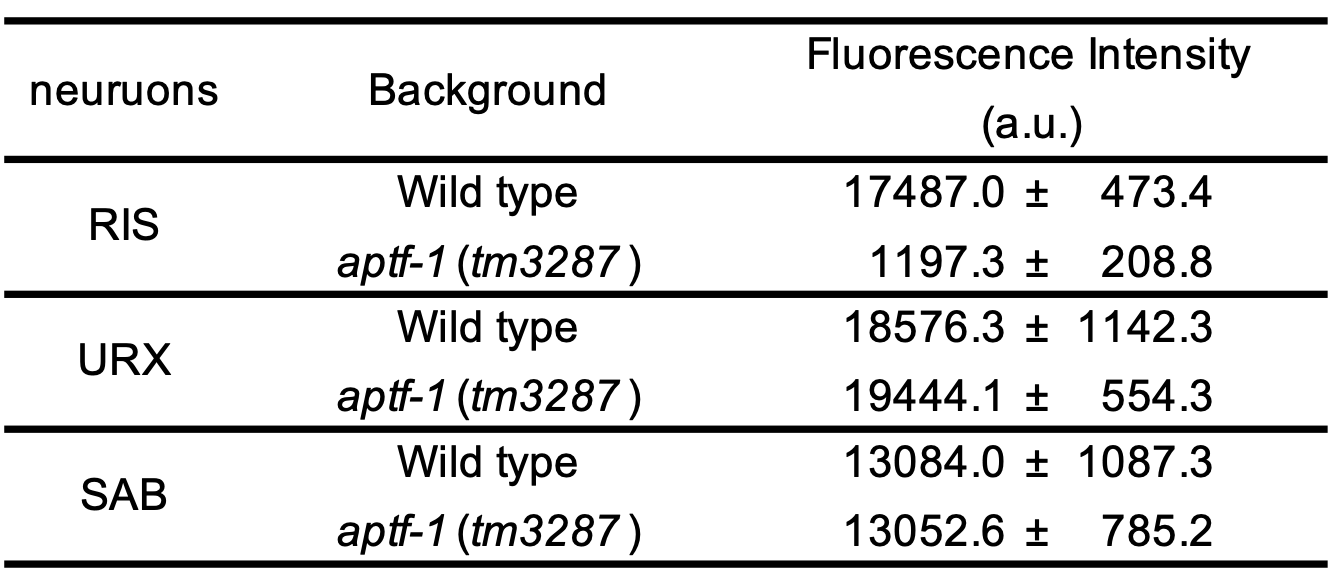
**

**
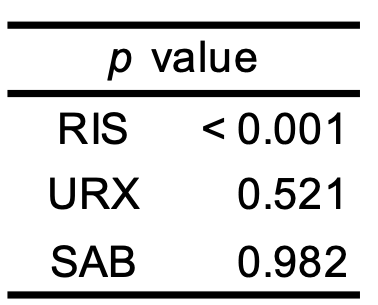
**

**Supplementary Table 4F. Effect the *npr-22* on DAF-7 production and secretion. (Figure 7B)**

**Effect on DAF-7 production. (Fig. 7. left)**

**
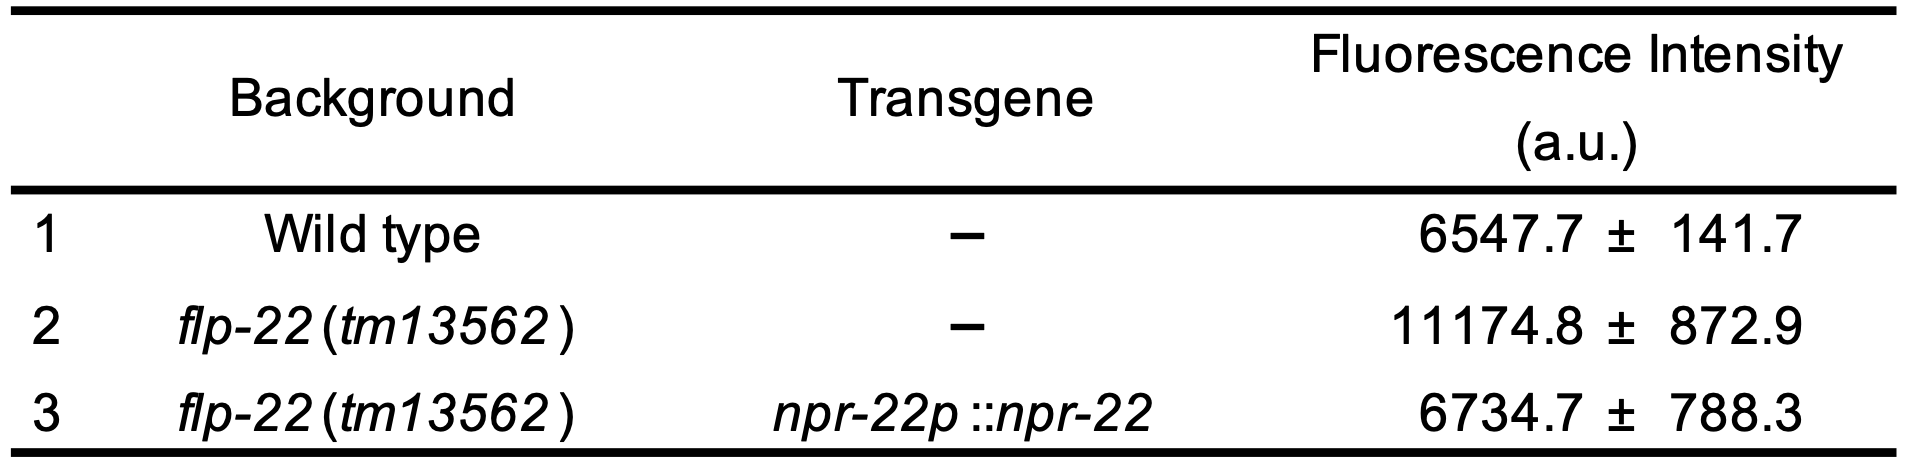
**

**
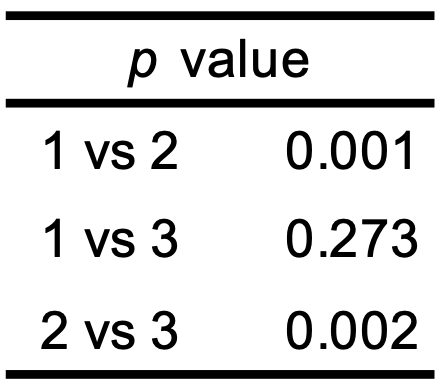
**

**Effect on DAF-7 secretion. (Fig. 7. right)**

**
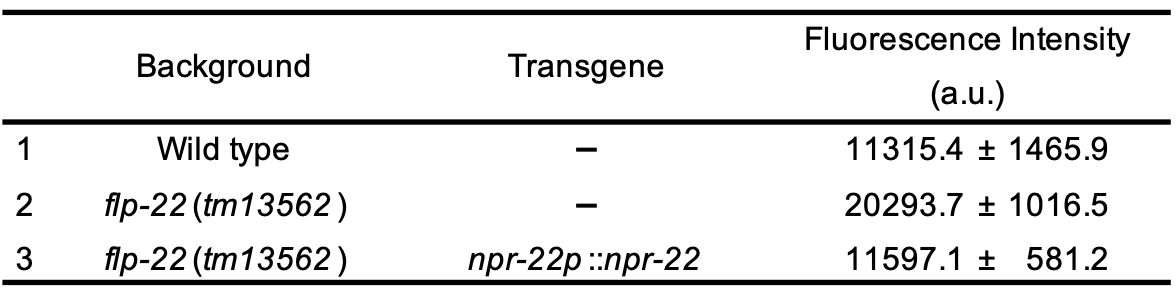
**

**
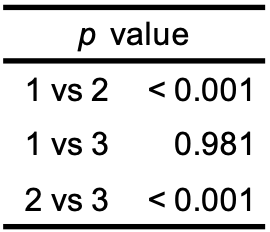
**

**Supplementary Table 5. Expression of NPRs in ASI neurons and a machine-learning for pairing FLP-11/the NPRs.**


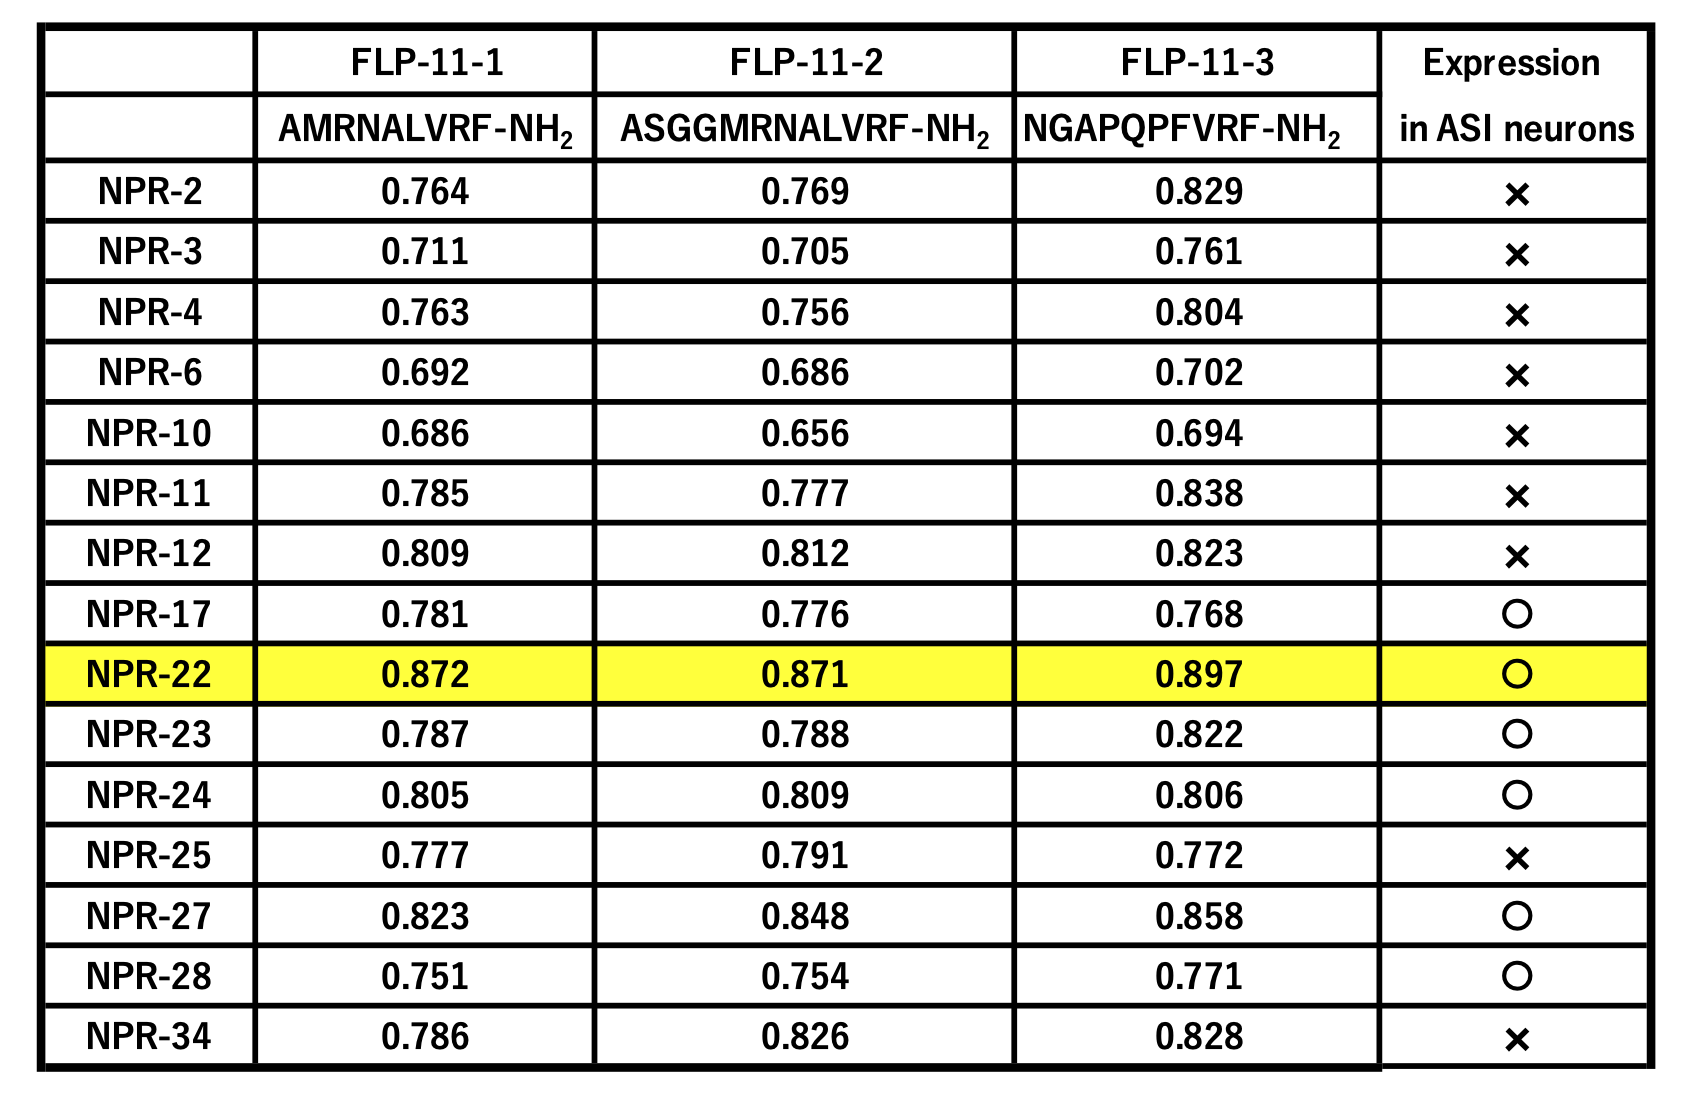

Supplement: Supplementary file 1 [file d36649a5f86d3bad8d03f69a.docx]
